# Supplementary material for: Symptoms of anxiety and depression in patients with persistent asthma: a cross-sectional analysis of the INSPIRERS studies
Source: PubMed Central journal article supplement — BMJ Open. 2023 May 5;13(5):e068725. doi: 10.1136/bmjopen-2022-068725 (PMC10163458; doi:10.1136/bmjopen-2022-068725), 2023-05-05
Supplement: bmjopen-2022-068725.draft_revisions.pdf [file bmjopen-2022-068725.draft_revisions.pdf]

# BMJ Open

BMJ Open is committed to open peer review. As part of this commitment we make the peer review history of every article we publish publicly available.

When an article is published we post the peer reviewers' comments and the authors' responses online. We also post the versions of the paper that were used during peer review. These are the versions that the peer review comments apply to.

The versions of the paper that follow are the versions that were submitted during the peer review process. They are not the versions of record or the final published versions. They should not be cited or distributed as the published version of this manuscript.

BMJ Open is an open access journal and the full, final, typeset and author-corrected version of record of the manuscript is available on our site with no access controls, subscription charges or pay-per-view fees (<http://bmjopen.bmj.com>).

If you have any questions on BMJ Open's open peer review process please email [info.bmjopen@bmj.com](mailto:info.bmjopen@bmj.com)

# BMJ Open

## Symptoms of anxiety and depression in patients with persistent asthma: agreement between HADS and EQ-5D

|                               |                                                                                                                                                                                                                                                                                                                                                                                                                                                                                                                                                                                                                                                                                                                                                                                                                                                                                                                                                                                                                                                                                                                                                                                                                                                                                                                                                                                                                                                                                                                                                                                                                                                                                                                                                                                                                                                                                                                                                                                                                                                                                                                                                                                                                                                                                                                                                                                                           |
|-------------------------------|-----------------------------------------------------------------------------------------------------------------------------------------------------------------------------------------------------------------------------------------------------------------------------------------------------------------------------------------------------------------------------------------------------------------------------------------------------------------------------------------------------------------------------------------------------------------------------------------------------------------------------------------------------------------------------------------------------------------------------------------------------------------------------------------------------------------------------------------------------------------------------------------------------------------------------------------------------------------------------------------------------------------------------------------------------------------------------------------------------------------------------------------------------------------------------------------------------------------------------------------------------------------------------------------------------------------------------------------------------------------------------------------------------------------------------------------------------------------------------------------------------------------------------------------------------------------------------------------------------------------------------------------------------------------------------------------------------------------------------------------------------------------------------------------------------------------------------------------------------------------------------------------------------------------------------------------------------------------------------------------------------------------------------------------------------------------------------------------------------------------------------------------------------------------------------------------------------------------------------------------------------------------------------------------------------------------------------------------------------------------------------------------------------------|
| Journal:                      | <i>BMJ Open</i>                                                                                                                                                                                                                                                                                                                                                                                                                                                                                                                                                                                                                                                                                                                                                                                                                                                                                                                                                                                                                                                                                                                                                                                                                                                                                                                                                                                                                                                                                                                                                                                                                                                                                                                                                                                                                                                                                                                                                                                                                                                                                                                                                                                                                                                                                                                                                                                           |
| Manuscript ID                 | bmjopen-2022-068725                                                                                                                                                                                                                                                                                                                                                                                                                                                                                                                                                                                                                                                                                                                                                                                                                                                                                                                                                                                                                                                                                                                                                                                                                                                                                                                                                                                                                                                                                                                                                                                                                                                                                                                                                                                                                                                                                                                                                                                                                                                                                                                                                                                                                                                                                                                                                                                       |
| Article Type:                 | Original research                                                                                                                                                                                                                                                                                                                                                                                                                                                                                                                                                                                                                                                                                                                                                                                                                                                                                                                                                                                                                                                                                                                                                                                                                                                                                                                                                                                                                                                                                                                                                                                                                                                                                                                                                                                                                                                                                                                                                                                                                                                                                                                                                                                                                                                                                                                                                                                         |
| Date Submitted by the Author: | 28-Sep-2022                                                                                                                                                                                                                                                                                                                                                                                                                                                                                                                                                                                                                                                                                                                                                                                                                                                                                                                                                                                                                                                                                                                                                                                                                                                                                                                                                                                                                                                                                                                                                                                                                                                                                                                                                                                                                                                                                                                                                                                                                                                                                                                                                                                                                                                                                                                                                                                               |
| Complete List of Authors:     | <p>Simões Cunha, Mafalda; CINTESIS<br/> Amaral, Rita; University of Porto, CINTESIS; Faculty of Medicine of University of Porto, Portugal<br/> Pereira, A. M.; CUF-Porto Hospital and Institute, Immunoallergy; CINTESIS<br/> Almeida, Rute; CINTESIS, MEDCIDS<br/> Alves-Correia, Magna; CINTESIS; Hospital CUF, Allergy Unit<br/> Loureiro, Cláudia Chaves; Coimbra University Hospital,, Pneumology<br/> Lopes, Cristina; FMUP, Basic and Clinic Immunology; Hospital Pedro Hispano, immuno-allergy<br/> Carvalho, Joana; Unidade Local de Saúde de Matosinhos EPE, Serviço de Pediatria<br/> Ribeiro, Carmelita; Centro Hospitalar e Universitário de Coimbra EPE, Serviço de Imunoalergologia, Hospital Universitário de Coimbra<br/> Vidal, Carmen; Complejo Hospitalario Universitario, Department of Medicine<br/> Antolín-Amérigo, Dario; Hospital Universitario Ramón y Cajal, Servicio de Alergia<br/> Pinto, Diana; Centro Hospitalar Universitário do Porto EPE Centro Materno-Infantil do Norte Dr Albino Aroso, Serviço de Pediatria<br/> Ferreira-Magalhães, Manuel; CINTESIS, MEDCIDS; Centro Hospitalar Universitário do Porto EPE Centro Materno-Infantil do Norte Dr Albino Aroso, Serviço de pediatria<br/> Vasconcelos, Maria João; Hospital São João, immuno-allergy<br/> Lozoya, Carlos ; Hospital Amato Lusitano, Allergy<br/> Santos, Natacha; Centro Hospitalar do Algarve EPE, immuno-allergy<br/> Cardia , Francisca; Unidade de Saúde Familiar Terras de Azurara<br/> Taborda-Barata, Luís; CICS - Health Sciences Research Centre; NuESA - Environment &amp; Health Study Group, Faculty of Health Sciences, University of Beira Interior; Department of Allergy &amp; Clinical Immunology, Cova da Beira University Hospital Centre<br/> Ferreira, Rosário ; Centro Hospitalar de Lisboa Norte, Serviço de Pediatria<br/> Morais Silva, Pedro ; Grupo HPA Saúde, Immuno-Allergy<br/> Ferreira, Tania; Agrupamento de Centros de Saúde Baixo Mondego<br/> Câmara, Raquel; Centro Hospitalar Barreiro Montijo EPE<br/> Silva, Eurico; Agrupamento de Centros de Saúde de Baixo Vouga<br/> Bordalo, Diana; Centro Hospitalar do Médio Ave EPE, Serviço de Pediatria<br/> Guimarães , Cristina; Agrupamento de Centros de Saúde Pinhal Litoral<br/> Calix, Maria José; Centro Hospitalar Tondela Viseu EPE<br/> da Silva, Sofia; Unidade Local de Saúde do Alto Minho EPE</p> |

|           |                                                                                                                                                                                                                                                                                                                                                                                                                                                                                                                                                                                                                                                                                                                                                                                                                                                                                                                                                                                                                                                                                                                                                                                                                                                                                                                                                                                                                                                                            |
|-----------|----------------------------------------------------------------------------------------------------------------------------------------------------------------------------------------------------------------------------------------------------------------------------------------------------------------------------------------------------------------------------------------------------------------------------------------------------------------------------------------------------------------------------------------------------------------------------------------------------------------------------------------------------------------------------------------------------------------------------------------------------------------------------------------------------------------------------------------------------------------------------------------------------------------------------------------------------------------------------------------------------------------------------------------------------------------------------------------------------------------------------------------------------------------------------------------------------------------------------------------------------------------------------------------------------------------------------------------------------------------------------------------------------------------------------------------------------------------------------|
|           | <p>Marques, Maria; Senhora da Oliveira Hospital Guimaraes, Serviço de Imunoalergologia</p> <p>Morete, Ana; Hospital CUF, Allergy Unit; Baixo Vouga Hospital Centre</p> <p>Nunes, Carlos; Centro de Imunoalergologia do Algarve</p> <p>Vieira, Cláudia; Agrupamento de Centros de Saúde Douro I - Marão e Douro Norte</p> <p>Páscoa, Rosália; Faculty of Medicine, University of Porto, Department of Community Medicine, Information and Health Decision Sciences (MEDCIDS) and Centre for Health Technology and Services Research (CINTESIS), University of Porto, Porto, Portugal.</p> <p>Alves, Adelaide; Vila Nova de Gaia Espinho Hospital Center, Serviço de Pneumologia</p> <p>Marques, José ; Agrupamento de Centros de Saúde do Dão Lafões</p> <p>Reis, Bruno; Agrupamento de Centros de Saúde Pinhal Litoral</p> <p>Monteiro, Luís; CINTESIS, ; USF Esgueira +,</p> <p>Monteiro, Rosário; CINTESIS, MEDCIDS; ACeS Porto Ocidental</p> <p>Cepa, Margarida; ACES Pinhal Litoral</p> <p>Valentim, Bruno; ACES Baixo Mondego</p> <p>Coelho, Daniela; ACES Tâmega I - Baixo Tâmega</p> <p>Fernandes, Sara; ACES Cávado I</p> <p>Meireles, Patrícia; ACES Douro II - Douro Sul</p> <p>Aguiar, Margarida; ACES Grande Porto III - Maia / Valongo</p> <p>Mourão, Ana; ACES Grande Porto VIII - Espinho / Gaia</p> <p>Fonseca, Joao A.; CINTESIS, MEDCIDS; Instituto and Hospital CUF, Allergy Unit</p> <p>Jácome, Cristina; University of Porto, Faculty of Medicine</p> |
| Keywords: | Asthma < THORACIC MEDICINE, Anxiety disorders < PSYCHIATRY, Depression & mood disorders < PSYCHIATRY                                                                                                                                                                                                                                                                                                                                                                                                                                                                                                                                                                                                                                                                                                                                                                                                                                                                                                                                                                                                                                                                                                                                                                                                                                                                                                                                                                       |
|           |                                                                                                                                                                                                                                                                                                                                                                                                                                                                                                                                                                                                                                                                                                                                                                                                                                                                                                                                                                                                                                                                                                                                                                                                                                                                                                                                                                                                                                                                            |

SCHOLARONE™  
Manuscripts

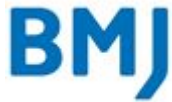

I, the Submitting Author has the right to grant and does grant on behalf of all authors of the Work (as defined in the below author licence), an exclusive licence and/or a non-exclusive licence for contributions from authors who are: i) UK Crown employees; ii) where BMJ has agreed a CC-BY licence shall apply, and/or iii) in accordance with the terms applicable for US Federal Government officers or employees acting as part of their official duties; on a worldwide, perpetual, irrevocable, royalty-free basis to BMJ Publishing Group Ltd ("BMJ") its licensees and where the relevant Journal is co-owned by BMJ to the co-owners of the Journal, to publish the Work in this journal and any other BMJ products and to exploit all rights, as set out in our [licence](#).

The Submitting Author accepts and understands that any supply made under these terms is made by BMJ to the Submitting Author unless you are acting as an employee on behalf of your employer or a postgraduate student of an affiliated institution which is paying any applicable article publishing charge ("APC") for Open Access articles. Where the Submitting Author wishes to make the Work available on an Open Access basis (and intends to pay the relevant APC), the terms of reuse of such Open Access shall be governed by a Creative Commons licence – details of these licences and which [Creative Commons](#) licence will apply to this Work are set out in our licence referred to above.

Other than as permitted in any relevant BMJ Author's Self Archiving Policies, I confirm this Work has not been accepted for publication elsewhere, is not being considered for publication elsewhere and does not duplicate material already published. I confirm all authors consent to publication of this Work and authorise the granting of this licence.

1 **Title**2 **Symptoms of anxiety and depression in patients with persistent**3 **asthma: agreement between HADS and EQ-5D**

4 Mafalda Simões Cunha 1; Rita Amaral 2,3,4,5; Ana Margarida Pereira 1,2,6; Rute Almeida 3; Magna  
 5 Alves-Correia M 1,2; Cláudia Chaves-Loureiro 7; Cristina Lopes 8,9; Joana Carvalho 10; Carmelita  
 6 Ribeiro 11; Carmen Vidal 12, Darío Antolín-Amérigo 13, Diana Pinto 14; Manuel Ferreira-Magalhães  
 7 3,14; Maria João Vasconcelos 15; Carlos Lozoya 16; Natacha Santos 17; Francisca Cardia 18; Luís  
 8 Taborda-Barata 19,20; Rosário Ferreira 21; Pedro Morais Silva 22; Tania Monteiro Ferreira 23; Raquel  
 9 Camara 24; Eurico Silva 25; Diana Bordalo 26; Cristina Guimarães 27; Maria José Cálix 28; Sofia da Silva  
 10 29; Maria Luís Marques 30; Ana Morete 2, 31; Carlos Nunes 32; Cláudia Vieira 33; Rosália Páscoa  
 11 1,6,34; Adelaide Alves 35; José Varanda Marques 36; Bruno Reis 37; Luís Monteiro 1,38; Rosário  
 12 Monteiro 3,34; Margarida Cepa 39; Bruno Valentim 40; Daniela Sousa Coelho 41; Sara Fernandes 42;  
 13 Patrícia Meireles 43; Margarida Abreu Aguiar 44; Ana Rita Mourão 45; João Almeida Fonseca 2,3,46;  
 14 Cristina Jácome 3, INSPIRERS group

- 15 1. Center for Health Technology and Services Research (CINTESIS), Faculty of Medicine, University  
 16 of Porto, Porto , PT
- 17 2. Allergy Unit, Instituto and Hospital CUF , Porto , PT
- 18 3. CINTESIS@RISE, MEDCIDS, Faculty of Medicine of the University of Porto, Porto, Portugal
- 19 4. Department of Cardiovascular and Respiratory Sciences, Porto Health School, Polytechnic  
 20 Institute of Porto, Porto , PT
- 21 5. Department of Women's and Children's Health, Paediatric Research, Uppsala  
 22 University, Uppsala , SE
- 23 6. Department of Community Medicine, Information and Health Decision Sciences  
 24 (MEDCIDS), Faculty of Medicine, University of Porto, Porto , PT
- 25 7. Pulmonology Department, Hospitais da Universidade de Coimbra, Centro Hospitalar e  
 26 Universitário de Coimbra, Coimbra, Portugal; Clinical Academic Center of Coimbra, Portugal.
- 27 8. Imunologia Básica e Clínica, Faculdade de Medicina, Universidade do Porto, Porto , PT
- 28 9. Unidade de Imunoalergologia, Hospital Pedro Hispano, Unidade Local de Saúde de  
 29 Matosinhos, Matosinhos , PT
- 30 10. Serviço de Pediatria, Hospital Pedro Hispano, Unidade Local de Saúde de  
 31 Matosinhos, Matosinhos , PT
- 32 11. Serviço de Imunoalergologia, Centro Hospitalar e Universitário de Coimbra , Coimbra , PT
- 33 12. Servicio de Alergia, Complejo Hospitalario Universitario de Santiago, Santiago de Compostela,  
 34 Spain
- 35 13. Servicio de Alergia, Hospital Universitario Ramón y Cajal, Instituto Ramón y Cajal de Investigación  
 36 Sanitaria, Madrid, Spain
- 37 14. Serviço de Pediatria, Centro Materno Infantil do Norte, Centro Hospitalar Universitário do  
 38 Porto, Porto , PT
- 39 15. Serviço de Imunoalergologia, Centro Hospitalar Universitário de São João , Porto , PT
- 40 16. Serviço de Imunoalergologia, Hospital Amato Lusitano, Unidade Local de Saúde de Castelo  
 41 Branco, Castelo Branco , PT
- 42 17. Serviço de Imunoalergologia, Centro Hospitalar Universitário do Algarve , Portimão , PT
- 43 18. Unidade de Saúde Familiar Terras de Azurara, Agrupamento de Centros de Saúde Dão  
 44 Lafões , Mangualde , PT
- 45 19. Department of Allergy & Clinical Immunology, Cova da Beira University Hospital  
 46 Centre , Covilhã , PT

- 1  
2  
3 47 20. CICS-UBI Centro de Investigação em Ciências da Saúde - Health Sciences Research Centre &  
4 48 UBI Air – Clinical & Experimental Lung Centre, University of Beira Interior, Covilhã , PT  
5 49 21. Departamento de Pediatria, Hospital de Santa Maria, Centro Hospitalar de Lisboa Norte, Lisboa,  
6 50 PT  
7 51 22. Imunoalergologia, Grupo HPA Saúde , Portimão , PT  
8 52 23. Unidade de Saúde Familiar Progresso e Saúde, Agrupamento de Centros de Saúde Baixo  
9 53 Mondego , Tocha , PT  
10 54 24. Serviço de Pneumologia, Hospital Nossa Senhora do Rosário, Centro Hospitalar Barreiro  
11 55 Montijo, Barreiro , PT  
12 56 25. Unidade de Saúde Familiar João Semana, Agrupamento de Centros de Saúde Baixo  
13 57 Vouga , Ovar , PT  
14 58 26. Serviço de Pediatria, Unidade Hospitalar de Famalicão, Centro Hospitalar do Médio Ave, Vila  
15 59 Nova de Famalicão , PT  
16 60 27. Unidade de Cuidados de Saúde Personalizados Norte (Arnaldo Sampaio), Agrupamento de  
17 61 Centros de Saúde Pinhal Litoral, Monte Redondo, PT  
18 62 28. Serviço de Pediatria, Hospital de São Teotónio, Centro Hospitalar Tondela–Viseu, Viseu , PT  
19 63 29. Unidade de Saúde Familiar Cuidarte, Unidade Local de Saúde do Alto Minho , Portuzelo , PT  
20 64 30. Serviço de Imunoalergologia, Hospital da Senhora da Oliveira, Guimarães, PT  
21 65 31. Serviço de Imunoalergologia, Hospital Infante D Pedro, Centro Hospitalar Baixo  
22 66 Vouga, Aveiro , PT  
23 67 32. Imunoalergologia, Centro de Imunoalergologia do Algarve , Portimão , PT  
24 68 33. Unidade de Saúde Familiar Corgo, Agrupamentos de Centros de Saúde Douro I - Marão e Douro  
25 69 Norte , Vila Real , PT  
26 70 34. Unidade de Saúde Familiar Homem do Leme, ACeS Porto Ocidental, Porto, Portugal  
27 71 35. Serviço de Pneumologia, Unidade I, Centro Hospitalar Vila Nova de Gaia/Espinho, Vila Nova de  
28 72 Gaia , PT  
29 73 36. Unidade de Saúde Familiar Viseu-Cidade, Agrupamento de Centros de Saúde do Dão  
30 74 Lafões , Viseu , PT  
31 75 37. Unidade de Cuidados Saúde Personalizados Sicó, Agrupamento de Centros de Saúde Pinhal  
32 76 Litoral , Leiria , PT  
33 77 38. Unidade de Saúde Familiar Esgueira+, ACES Baixo Vouga, Esgueira, Portugal  
34 78 39. Unidade de Saúde Familiar Marquês, ACES Pinhal Litoral, Pombal, Portugal  
35 79 40. Unidade de Saúde Familiar Condeixa, ACES Baixo Mondego, Condeixa-a-Nova, Portugal  
36 80 41. Unidade de Cuidados de Saúde Personalizados de Amarante, ACES Tâmega I – Baixo Tâmega,  
37 81 Amarante, Portugal  
38 82 42. Unidade de Saúde Familiar Bracara Augusta, ACES Cávado I – Braga, Braga, Portugal  
39 83 43. Unidade de Saúde Familiar Almedina, ACES Douro II - Douro Sul, Lamego, Portugal  
40 84 44. Unidade de Saúde Familiar Valongo, ACES Grande Porto III - Maia / Valongo, Valongo, Portugal  
41 85 45. Unidade de Saúde Familiar Canelas, ACES Grande Porto VIII - Espinho / Gaia, Vila Nova Gaia,  
42 86 Portugal  
43 87 46. MEDIDA – Medicina, Educação, Investigação, Desenvolvimento e Avaliação, Porto, Portugal  
44 88

48 89 **Corresponding author:** Cristina Jácome, Center for Health Technology and Services Research

49 90 (CINTESIS), Department of Community Medicine, Information and Health Decision Sciences

50 91 (MEDCIDS), Faculty of Medicine, University of Porto, Portugal; e-mail:

51 92 [cristinajacome.ft@gmail.com](mailto:cristinajacome.ft@gmail.com)

52 93

## 94 **Abstract**

95 **Objectives:** Anxiety and depression are relevant comorbidities in asthma, but, in  
96 Portugal and Spain, data on this topic are scarce. We assessed, in patients with asthma, the  
97 frequency of anxiety and depression using the Hospital Anxiety and Depression Scale (HADS)  
98 and the European Quality of Life Five Dimension Questionnaire (EQ-5D); the level of  
99 agreement between these questionnaires, and the factors associated with these symptoms.

100 **Methods:** This is a secondary analysis of the INSPIRERS studies. A total of 614  
101 adolescents and adults with persistent asthma ( $32.6 \pm 16.9$ y, 64.7% female) were recruited  
102 from 30 primary care centres and 32 allergy, pulmonology and pediatric clinics. Demographic  
103 and clinical characteristics, HADS and EQ-5D were collected. A score  $\geq 8$  on HADS-A/HADS-D  
104 or a positive answer to EQ-5D item 5 indicated the presence of these symptoms. Agreement  
105 was determined by Cohen's kappa. Two multivariable logistic regressions were built.

106 **Results:** According to HADS, 36% of the participants had symptoms of anxiety and 12%  
107 of depression. According to EQ-5D, 36% of the participants had anxiety/depression. The  
108 agreement between questionnaires in identifying anxiety/depression was moderate ( $k=0.55$ ,  
109 95%CI 0.48-0.62). Late asthma diagnosis, comorbidities and female gender were predictors  
110 of anxiety/depression, while better asthma control, health-related quality of life and  
111 perception of health were associated with lower odds for anxiety/depression.

112 **Conclusion:** At least 1/3 of the patients with persistent asthma experience symptoms  
113 of anxiety/depression, showing the relevance of screening these disorders in patients with  
114 asthma. Our results support the complementary use of these questionnaires.

115

1  
2  
3  
4 116 **Strengths and limitations of this study**  
5  
6

7 117 This study is a secondary analysis of a multicentric study that recruited both adults and  
8  
9 118 adolescents with asthma from primary and secondary care.  
10

11  
12 119 A comprehensive set of individual-level characteristics was analysed, which allowed us to  
13  
14 120 explore the impact of sociodemographic factors and cofactors such as quality of life and  
15  
16 121 asthma control on the presence of anxiety/depression symptoms.  
17  
18

19  
20 122 A possible source of bias was the recruitment strategy based on convenience sampling.  
21  
22

23 123 The frequency of distressing symptoms and the relationships with associated factors could  
24  
25 124 not be established overtime.  
26  
27

28  
29 125 **Word count:** 3094  
30

31 126  
32  
33

34  
35 127 **Key Words:** Asthma; Anxiety Disorders; Anxiety Disorders/epidemiology; Depression  
36  
37 128 Disorder; Depressive Disorder/epidemiology; Surveys and Questionnaires;  
38  
39 129 Portugal/epidemiology; Spain/epidemiology.  
40  
41  
42

43 130  
44  
45  
46  
47  
48  
49  
50  
51  
52  
53  
54  
55  
56  
57  
58  
59  
60



## 131 **Introduction**

132 Asthma affects approximately 300 million people worldwide [1]. In Portugal, asthma  
133 affects 695 000 Portuguese, with a general prevalence of 6.8% [2]. In Spain, asthma affects  
134 more than three million people, with an estimated prevalence of 5% in adults [3]. Asthma is  
135 primarily related to chronic inflammation of the lower respiratory tract, variable airflow  
136 obstruction, and bronchial hyperresponsiveness [4]. Yet, this disease is often accompanied by  
137 multiple associated comorbidities, such as chronic rhinosinusitis, nasal polyposis, allergic  
138 rhinitis, gastroesophageal reflux disease, obstructive sleep apnea syndrome [5], and also  
139 anxiety and depression.

140 In two systematic reviews, the average of the reported prevalence of any anxiety  
141 disorder among patients with asthma was 24% [6] and 34% [7]. Regarding depression, a  
142 pragmatic literature review found that 1% to 45% of patients with asthma suffer from  
143 depression or depressive symptoms [8]. In severe asthma, a study reported an average  
144 prevalence of 27% for emotional distress (mainly due to anxiety and depression) [9].  
145 Currently, most studies about emotional distress focus essentially on adult patients with more  
146 severe asthma [10]. There is a lack of data regarding other asthma sub-groups, namely  
147 adolescents and those with mild or moderate persistent asthma.

148 Anxiety and depression are associated with significantly lower quality of life, poor  
149 asthma control, higher frequency of exacerbations and increased use of healthcare resources  
150 [11]. Moreover, anxiety is associated with greater perceived dyspnea intensity and may shape  
151 the quality and intensity of this symptom at a given respiratory load [12]. However, it is still  
152 uncertain whether other factors can affect the patient's psychological state. It is important to  
153 have a more sophisticated understanding of the interplay between emotional distress and  
154 asthma [13].

1  
2  
3 155           Despite these negative impacts, anxiety and depression in patients with asthma is not  
4  
5  
6 156   routinely assessed during clinical visits and thus there is a lack of information about its real-  
7  
8 157   world frequency. One of the most used tools for psychological screening is the Hospital  
9  
10 158   Anxiety and Depression Scale (HADS). HADS is a self-report questionnaire designed to screen  
11  
12  
13 159   anxiety and depression symptoms [14] and it was already used in adolescents and adults with  
14  
15 160   asthma in previous studies [15, 16]. However, this scale has 14 items and although it takes  
16  
17  
18 161   around 5 minutes to complete [17], it is not always feasible to administer in a busy clinic  
19  
20 162   setting [18, 19]. European Quality of Life Five Dimension Questionnaire (EQ-5D) is a generic  
21  
22  
23 163   measure of health status that provides a simple descriptive profile and a single index value  
24  
25 164   that can be used for the clinical and economic evaluation of healthcare [20], but also  
26  
27  
28 165   emotional distress screening [21]. Currently, EQ-5D is being widely used in a variety of  
29  
30 166   conditions, where asthma is integrated [22]. Some studies compared HADS and EQ-5D in  
31  
32  
33 167   patients with other diseases and showed that EQ-5D can be responsive to different degrees  
34  
35 168   of HADS-assessed distress [23]. Yet, there is no published data comparing HADS and EQ-5D in  
36  
37  
38 169   patients with asthma.

39  
40 170           With the present study, we aimed to assess i) the frequency of symptoms of anxiety  
41  
42 171   and depression in patients with asthma as assessed by HADS and EQ-5D questionnaires; ii)  
43  
44  
45 172   the level of agreement between the two questionnaires and iii) the factors associated with  
46  
47  
48 173   the presence of these symptoms

## 49 174   **Methods**

### 50 175   **Patient and public involvement**

51  
52  
53  
54  
55 176           No patient involved

### 56 57 58 177   **Study design**

1  
2  
3 178 Data from the baseline face-to-face visit from 5 prospective observational studies of  
4  
5  
6 179 the INSPIRERS project were analysed [24]. This project addresses the topic of adherence to  
7  
8 180 asthma inhalers among adolescents and adults with persistent asthma. Convenience samples  
9  
10  
11 181 were recruited between November 2017 and October 2020 at 32 allergy, pulmonology and  
12  
13 182 paediatric secondary care outpatient clinics (30 from Portugal and 2 from Spain) and 30  
14  
15 183 primary care centres from Portugal. The studies were approved by the ethics committees of  
16  
17  
18 184 all participating centres. Eligible patients were approached by physicians during medical visits.  
19  
20  
21 185 Adult patients signed a consent form. Adolescents signed an assent form, and a parental  
22  
23 186 consent form was also obtained. The studies had similar inclusion criteria and methods. The  
24  
25 187 study is reported according to Strengthening the Reporting of Observational Studies in  
26  
27  
28 188 Epidemiology (STROBE) guidelines [25].

## 30 189 **Patients**

31  
32  
33 190 Patients were included in the analysis if they had a previous medical diagnosis of  
34  
35 191 persistent asthma, were at least 13 years old (13–17 years adolescents;  $\geq 18$  years adults) and  
36  
37  
38 192 had an active prescription for an inhaled controller medication for asthma. All inhaled  
39  
40 193 controller treatments were allowed, and there was no change in any prescribed medication  
41  
42  
43 194 regarding the participation in these studies. Patients were excluded if they had a diagnosis of  
44  
45 195 a chronic lung disease other than asthma or a diagnosis of another significant chronic  
46  
47  
48 196 condition with possible interference with the study aims.

## 50 197 **Data collection**

51  
52  
53 198 During the baseline face-to-face visit, data were collected from both physicians and  
54  
55 199 patients. Physicians answered a questionnaire including the Global Initiative for Asthma  
56  
57  
58 200 (GINA) assessment of symptom control [25], the asthma treatment plan and comorbidities.  
59  
60

1  
2  
3 201 Information about the healthcare setting (primary, secondary) was obtained based on the  
4  
5  
6 202 centre where patients were recruited.  
7

8 203 Demographic data (age, gender, educational level, marital status and current  
9  
10 204 occupation) and clinical data (weight, height, smoking habits, and age of asthma diagnosis)  
11  
12  
13 205 were collected from patients. Asthma control was also assessed using the Control of Allergic  
14  
15 206 Rhinitis and Asthma Test (CARAT). CARAT is a self-report questionnaire with a total score  
16  
17  
18 207 (CARAT-T) calculated by summing up the score of each of the 10 questions, resulting in a range  
19  
20 208 of 0–30 points. A score >24 indicates good disease control [26].  
21  
22

23 209 The Portuguese version of the Hospital Anxiety and Depression Scale (HADS) was used  
24  
25 210 to assess the presence of symptoms of anxiety and depression [27]. HADS contains 14 items  
26  
27  
28 211 related to the past week, 7 of which assess anxiety symptoms (HADS-A) and the other 7  
29  
30 212 depression symptoms (HADS-D). HADS-A and HADS-D are scored separately. The item  
31  
32  
33 213 response scale varies between 0 and 3 points, with total scores ranging from 0 (minimum  
34  
35 214 symptomatic load) up to 21 (maximum symptomatic load) for HADS-A and HADS-D. A score  
36  
37 215  $\geq 8$  on HADS-A or HADS-D was considered as the presence of symptoms of anxiety or  
38  
39  
40 216 depression, respectively [28].  
41

42 217 The European Quality of Life Five Dimension Questionnaire (EQ-5D) three-level  
43  
44  
45 218 version was filled in by the patients to assess their overall quality of life. The item 5 “Anxiety  
46  
47 219 and Depression” could be a useful tool in screening for anxiety and depressive symptoms in  
48  
49  
50 220 hospital and community settings [29]. Therefore, this item, with its 3 response options (“I am  
51  
52 221 not anxious or depressed”, “I am moderately anxious or depressed”, “I am extremely anxious  
53  
54 222 or depressed”) was additionally used to assess the presence of these symptoms [30]. Patients  
55  
56  
57 223 were considered to have anxiety/depression when answering “I am moderately anxious or  
58  
59 224 depressed” or “I am extremely anxious or depressed”. The EQ-5D summary index score was  
60

1  
2  
3 225 calculated to characterize the sample. It ranges from less than 0 (where 0 is a health state  
4  
5 226 equivalent to death) to 1 (perfect health) [31]. The EQ-5D VAS was also used to assess  
6  
7  
8 227 patients' perception of their general health (from 0 'the worst health you can imagine' to 100  
9  
10 228 'the best health you can imagine').

## 13 229 **Statistical Analyses**

15  
16 230 Descriptive statistics were used to characterize the sociodemographic variables,  
17  
18 231 clinical characteristics, the HADS score and EQ-5D responses. Absolute and relative  
19  
20 232 frequencies were used to characterize the categorical variables. Means and standard  
21  
22  
23 233 deviations or medians and interquartile ranges were used, according to data distribution, to  
24  
25 234 characterize the numerical variables.

26  
27  
28 235 To determine the agreement between HADS and EQ-5D questionnaires for the  
29  
30 236 presence of symptoms of anxiety/depression, the percentage of agreement and weighted  
31  
32  
33 237 Cohen's kappa were used. Cohen's kappa values were interpreted as follows: <0, no  
34  
35 238 agreement; 0–0.20, slight; 0.21–0.40, fair; 0.41–0.60, moderate; 0.61–0.80, substantial and  
36  
37  
38 239 0.81–1.0, almost perfect agreement [32].

39  
40 240 To explore associations between variables related to the presence of symptoms of  
41  
42 241 anxiety and depression, patients with and without symptoms of anxiety and depression were  
43  
44  
45 242 compared using independent t-tests for normally distributed data, Mann-Whitney U tests for  
46  
47 243 non-normally distributed continuous data and ordinal data, and Chi-square tests for  
48  
49  
50 244 categorical data. In the case of Chi-square tests, when a statistically significant difference was  
51  
52 245 found for a categorical variable with more than two categories, chi-square multiple  
53  
54  
55 246 comparison tests with Bonferroni correction were performed to explore which categories  
56  
57 247 differed from each other. The variables that were statistically different ( $p < 0.05$ ) between the  
58  
59 248 two groups were selected to further explore their relationship with the presence of anxiety

249 and depression and to adjust for possible confounders in two stepwise multivariable logistic  
 250 regression models. The dependent variable in each multivariable logistic regression was the  
 251 presence of symptoms of anxiety or depression based on HADS (0 = absent, 1 = present). The  
 252 overall models were evaluated using the goodness-of-fit tests and Nagelkerke's R-square and  
 253 the final model was selected based on the best combination of these results. The level of  
 254 significance considered was 0.05. Statistical analyses were performed using IBM SPSS  
 255 Statistics version 26.0 (IBM Corporation, Armonk, NY, USA).

## 256 **Results**

### 257 **Patient's Characteristics**

258 A total of 614 participants with asthma (mean age  $32.6 \pm 16.9$  years) were included in  
 259 this study. There were 447 (72.8%) adults and 397 (64.7%) females. Forty percent of the  
 260 participants had completed primary school (n=244), 47.4% were employed (n=289) and 65.1%  
 261 were prescribed only 1 inhaler (n=396). According to the GINA assessment of symptom  
 262 control, 296 (48.7%) patients had well controlled asthma. Table 1 shows the socio-  
 263 demographic and clinical characteristics of the study participants.

264 TABLE 1. Socio-demographic and clinical characteristics of the participants (n=614).

| Characteristics                            |                 |
|--------------------------------------------|-----------------|
| Age (years) M $\pm$ SD <sup>a</sup>        | 32.6 $\pm$ 16.9 |
| <b>Age group n (%)</b>                     |                 |
| Adolescent                                 | 167 (27.2)      |
| Adult                                      | 447 (72.8)      |
| <b>Gender n (%)</b>                        |                 |
| Female                                     | 397 (64.7)      |
| Male                                       | 217 (35.3)      |
| <b>Educational level n (%)<sup>b</sup></b> |                 |
| No education completed                     | 4 (0.7)         |
| Primary school                             | 244 (40.4)      |
| High school                                | 177 (29.3)      |

|                                                                    |                  |
|--------------------------------------------------------------------|------------------|
| Qualification above high school (but not university)               | 23 (3.8)         |
| University                                                         | 156 (25.4)       |
| Other                                                              | 1 (0.2)          |
| <b>Marital status n (%)<sup>c</sup></b>                            |                  |
| Single                                                             | 348 (56.7)       |
| Married/Living as a couple                                         | 223 (36.3)       |
| Separated/divorced                                                 | 33 (5.4)         |
| Widowed                                                            | 9 (1.5)          |
| <b>Current occupation n (%)<sup>d</sup></b>                        |                  |
| Employed                                                           | 289 (47.1)       |
| Student                                                            | 235 (38.3)       |
| Unemployed                                                         | 41 (6.7)         |
| Retired                                                            | 36 (5.9)         |
| Other                                                              | 9 (1.5)          |
| <b>BMI Kg/m<sup>2</sup>, M ± SD<sup>e</sup></b>                    | 24.7 (5.3)       |
| <b>Smoking Status n (%)<sup>d</sup></b>                            |                  |
| Never smoker                                                       | 457 (74.4)       |
| Ex-smoker                                                          | 106 (17.3)       |
| Current smoker                                                     | 47 (7.7)         |
| <b>Setting</b>                                                     |                  |
| Secondary care                                                     | 475 (77.4)       |
| Primary care                                                       | 139 (22.6)       |
| <b>Age of asthma diagnosis (years) M ± SD<sup>f</sup></b>          | 16.2 ± 14.8      |
| <b>Number of prescribed inhalers n (%)<sup>g</sup></b>             |                  |
| 1                                                                  | 396 (64.5)       |
| 2                                                                  | 193 (31.4)       |
| ≥3                                                                 | 19 (3.1)         |
| <b>GINA assessment symptom control n (%)<sup>g</sup></b>           |                  |
| Well controlled                                                    | 296 (48.2)       |
| Partly controlled                                                  | 188 (30.6)       |
| Uncontrolled                                                       | 124 (20.2)       |
| <b>Number of physician-reported comorbidities Median (P25-P75)</b> | 1 [0-2]          |
| <b>CARAT-T Median (P25-P75)</b>                                    | 21 [16-25]       |
| <b>CARAT-T Classification</b>                                      |                  |
| Controlled n (%)                                                   | 156 (25.4)       |
| Uncontrolled n (%)                                                 | 458 (74.6)       |
| <b>EQ-5D-3L Median (P25-P75)</b>                                   |                  |
| Total                                                              | 0.91 [0.81-1.0]  |
| VAS                                                                | 80.0 [70.0-90.0] |

M = Mean; SD= Standard Deviation; BMI=body mass index; GINA = Global Initiative for Asthma; P25= 25<sup>th</sup> percentile; P75= 75<sup>th</sup> percentile; CARAT-T=Control of Allergic Rhinitis and Asthma Test total score; EQ-5D-3L= European Quality of Life Five Dimension Questionnaire-three-level version; VAS= Visual analogue scale.

<sup>a</sup> 8 missing values. <sup>b</sup> 9 missing values. <sup>c</sup> missing value. <sup>d</sup> 4 missing values. <sup>e</sup> 28 missing values. <sup>f</sup> 22 missing values. <sup>g</sup> 6 missing values.

1  
2  
3 269  
4  
5  
6

## 270 **Symptoms of anxiety and depression**

271 According to HADS, 221 (36.0%) participants had symptoms of anxiety, 73 (11.9%) had  
272 symptoms of depression, 59 (9.6%) both symptoms and 235 (38.3%) participants had  
273 symptoms of anxiety or depression. Both anxiety (41.4% vs 21.6%) and depression (14.1% vs  
274 6%) symptoms were more frequent in adults than adolescents. According to EQ-5D, 223  
275 (36.3%) participants had anxiety or depression problems, 32.6% were moderately anxious or  
276 depressed and 3.7% extremely anxious or depressed. The agreement between these two  
277 questionnaires was moderate for anxiety ( $k=0.54$  (95%CI 0.47-0.61)); sufficient for depression  
278 ( $k=0.23$  (95%CI 0.17-0.30)) and moderate for anxiety/depression ( $k=0.55$  (95% CI 0.48-0.62)).

## 279 **Predictors of anxiety and depression**

280 In the multivariable logistic regression (Table 2), being an adolescent (OR 0.43, 95% CI  
281 0.27-0.68), having a better asthma control (CARAT-T score) (OR 0.98, 95% CI 0.94-1.00) and a  
282 perception of better health (OR 0.97, 95% CI 0.95-0.98) were significantly associated with  
283 lower odds for the presence of anxiety symptoms. In contrast, being a female was significantly  
284 associated with a higher odd for the presence of anxiety symptoms (OR 1.75, 95% CI 1.56-  
285 2.64). Having better health-related quality of life (OR 0.97, 95%CI 0.95-0.99) and perception  
286 of better health (OR 0.97, 95% CI 0.96-0.99) were associated with a lower odd for the  
287 presence of depression. While asthma diagnosis at a later age (OR 1.03, 95% CI 1.01-1.05) and  
288 the presence of a higher number of comorbidities (OR 1.31, 95% CI 1.05-1.64) were associated  
289 with an increase in the likelihood of exhibiting symptoms of depression. The univariate  
290 analyses are presented in Supplementary Table 1.



291 Table 2 – Multivariable logistic regression analyses to explain anxiety and depression.

|                                                   | Anxiety               | Depression             |
|---------------------------------------------------|-----------------------|------------------------|
|                                                   | adjusted OR (95% CI)* | adjusted OR (95% CI)** |
| <b>Age group</b>                                  |                       |                        |
| Adolescent                                        | 0.43 (0.27-0.68)      | -                      |
| Adult                                             | Reference             | -                      |
| <b>Gender</b>                                     |                       |                        |
| Female                                            | 1.75 (1.56-2.64)      | -                      |
| Male                                              | Reference             | -                      |
| <b>Age of asthma diagnosis</b>                    | -                     | 1.03 (1.01-1.05)       |
| <b>Number of physician-reported comorbidities</b> | 1.17 (0.99-1.37)      | 1.31 (1.05-1.64)       |
| <b>CARAT T</b>                                    | 0.98 (0.94-1.00)      | -                      |
| <b>Quality of life (EQ-5D total)</b>              | -                     | 0.97 (0.95-0.99)       |
| <b>Perception of better health (EQ-5D VAS)</b>    | 0.97 (0.95-0.98)      | 0.97 (0.96-0.99)       |
| <b>R<sup>2</sup></b>                              | 22%                   | 23%                    |
| <b>Hosmer-Lemeshow test - p-value</b>             | .435                  | .449                   |

292 OR = Odds ratio; CI = Confidence interval; BMI = body mass index; CARAT-T = Control of Allergic Rhinitis and Asthma Test total score; EQ-5D  
 293 = European Quality of Life Five Dimension Questionnaire; VAS= Visual analogue scale.

294 \*Age, current occupation, setting, age of asthma diagnosis, GINA assessment of symptom control and quality of life (EQ-5D total) were also  
 295 tested but not included in the final adjusted model.

296 \*\*Age, age group, educational level, marital status, current occupation, BMI, GINA assessment of symptom control and CARAT T were also  
 297 tested but not included in the final adjusted model.

## 298 Discussion

299 This study showed that more than 1/3 of participants with asthma experienced  
 300 symptoms of anxiety and/or depression. Asthma diagnosis at a later age, presence of  
 301 comorbidities and female gender were predictors of anxiety/depression, while better asthma  
 302 control, health-related quality of life and perception of better health were factors associated  
 303 with lower odds for anxiety/depression. In this study, the agreement between HADS and EQ-  
 304 5D questionnaires in identifying anxiety and depression was sufficient to moderate.

305 According to HADS and EQ-5D questionnaires, more than 1/3 of the patients with  
 306 persistent asthma experience symptoms of anxiety/depression (38.3% and 36.3%  
 307 respectively). Therefore, the percentages of participants with one of these symptoms  
 308 detected by HADS and EQ-5D were similar. With HADS, it was possible to detect the

1  
2  
3 309 percentages of patients with persistent asthma that had only symptoms of anxiety (36.0%) or  
4  
5  
6 310 had only symptoms of depression (11.9%). The proportions found in the present study were  
7  
8 311 similar to the ones found among patients with asthma in previous reviews [7, 8], analysing  
9  
10 312 studies that included only, or mostly, adults with asthma. A study from the UK found similar  
11  
12  
13 313 frequencies of anxiety and depression using HADS, although a slightly higher cut-off has been  
14  
15 314 used (HADS-A/HADS-D $\geq$ 10) [33]. We found a lower frequency for depression as compared  
16  
17  
18 315 with a study in patients with severe asthma, where 25% reported depression [34]. This  
19  
20 316 difference might be explained by the role of poorer physical functioning on symptoms of  
21  
22  
23 317 depression [35]. Patients with severe asthma experience more physical disability. Other  
24  
25 318 studies reported that patients with severe asthma have more often emotional distress as  
26  
27  
28 319 compared to patients with mild-moderate asthma [36, 37].

30  
31 320 This study includes both adolescents and adults with persistent asthma, which is rarely  
32  
33 321 found in previous articles. However, anxiety and depression were only assessed at one time  
34  
35 322 point. Analysing emotional distress in the long run could be important as suggested in  
36  
37  
38 323 previous cohort studies that followed adolescents with asthma to young adulthood, showing  
39  
40 324 that there was a persistence or recurrence of anxiety and depression in adulthood [38, 39]. In  
41  
42  
43 325 our study, adults with persistent asthma presented an increased frequency of  
44  
45 326 anxiety/depression symptoms (vs adolescents), which is in accordance with a population-  
46  
47  
48 327 based study that reported that having asthma and older age were independent risk factors  
49  
50 328 for the presence of anxiety disorders, in participants above the age of 15 years [40].  
51  
52  
53 329 Therefore, emotional distress seems to be associated with age differences in patients with  
54  
55 330 persistent asthma.

1  
2  
3 331 Age at asthma onset has emerged as a critical factor in distinguishing the phenotypes  
4  
5  
6 332 of asthma [41]. Adult-onset asthma differs from asthma that first occurs in childhood since it  
7  
8 333 usually is less well controlled, is associated with a faster decline in lung function and with  
9  
10 334 more comorbidities [42, 43]. Moreover, worse asthma control and the presence of more  
11  
12 335 comorbidities might be associated with an increased risk of emotional distress [44]. These  
13  
14 336 results contribute to explaining our finding that asthma diagnosis at a later age and number  
15  
16 337 of physician-reported comorbidities were associated with a higher frequency of depression.  
17  
18 338 Female patients were more likely to have anxiety symptoms. This was previously observed in  
19  
20 339 other studies in asthma but also other respiratory diseases, such as COPD. Possibly these  
21  
22 340 gender differences are more than a specificity of respiratory diseases, but a reflection of the  
23  
24 341 known gender differences in the general population [45, 46].  
25  
26  
27  
28  
29  
30

31 342 In our study, the perception of better health was associated with a lower odd for the  
32  
33 343 presence of anxiety symptoms. In a previous study with patients with chronic obstructive  
34  
35 344 pulmonary disease (COPD), the perceived severity of COPD symptoms was predictive of  
36  
37 345 depression and anxiety [47]. These findings are in line with our study, although coming from  
38  
39 346 a different disease. The close correlation between asthma control, quality of life, anxiety, and  
40  
41 347 depression has been also confirmed in other studies [48, 49]. Consequently, in patients with  
42  
43 348 poor asthma control, physicians should ask about the symptoms of anxiety/depression or  
44  
45 349 screen it using simple tools like EQ-5D or HADS before making adjustments on asthma  
46  
47 350 treatment strategy [16].  
48  
49  
50  
51  
52

53 351 EQ-5D questionnaire is a common generic tool used to evaluate health interventions.  
54  
55 352 This questionnaire could be useful in clinical practice [50]. The EQ-5D anxiety or depression  
56  
57 353 domain had a greater agreement with the HADS score in identifying cases with both  
58  
59  
60

1  
2  
3 354 symptoms, as expected, than in identifying anxiety or depressive symptoms. In general, the  
4  
5  
6 355 percentages of patients with anxiety/depression detected by HADS and EQ-5D were similar.  
7  
8 356 Furthermore, it is expected that remarkably less time consumption is needed for the EQ-5D  
9  
10  
11 357 item 5 assessment compared with HADS [17, 51]. Therefore, EQ-5D score appears to have  
12  
13 358 value as a screening tool for anxiety or depression in patients with asthma. In a previous  
14  
15  
16 359 study, this questionnaire also seemed to be reasonably valid and moderately responsive in  
17  
18 360 patients with anxiety disorders [52]. This could be important in clinical practice because a  
19  
20  
21 361 generic health instrument like the EQ-5D, with few and quick questions, could be used to  
22  
23 362 easily raise awareness of a possible emotional distress in patients with asthma. A limitation  
24  
25 363 of EQ-5D is that anxiety and depression are two separate emotional disorders and their  
26  
27  
28 364 combination in a single item in this questionnaire could lead to inconsistencies in responses  
29  
30 365 [53]. Nevertheless, EQ-5D could be used as a first screening questionnaire and, in patients  
31  
32  
33 366 reporting anxiety or depression symptoms, a more specific questionnaire, such as HADS,  
34  
35 367 could be used to better characterize their symptoms. Actually, emotional distress screening  
36  
37  
38 368 is very important in clinical practice because physicians can use targeted interventions to  
39  
40 369 improve patients' symptoms. Studies about psychological interventions in adults with asthma  
41  
42  
43 370 suggest that education and simple psychological interventions namely relaxation techniques  
44  
45 371 and biofeedback or a stepped care approach could produce significant positive healthcare  
46  
47 372 outcomes [54, 55].

50 373 This study has some strengths that should be acknowledged: it is a multicentric study  
51  
52  
53 374 that recruited both adults and adolescents with asthma from primary and secondary care. A  
54  
55 375 comprehensive set of individual-level characteristics was collected and analysed, which  
56  
57  
58 376 allowed us to explore the impact of a range of sociodemographic factors, health literacy and  
59  
60 377 cofactors such as quality of life and asthma control. Therefore, includes a sample from

1  
2  
3 378 different health care contexts and with different clinical presentations, contributing to the  
4  
5  
6 379 robustness of these findings.  
7

8  
9 380 Nevertheless, it also has some limitations. A possible source of bias was the  
10  
11 381 recruitment strategy of using a convenience sampling. Future studies using other sampling  
12  
13 382 strategies could be important to generalise the results of our study. A control group of healthy  
14  
15  
16 383 individuals with similar socio-demographic characteristics should also be included in further  
17  
18 384 research to increase the validity of these findings. In the absence of a control group it would  
19  
20  
21 385 have been useful to compare anxiety/depression frequencies with normative data from  
22  
23 386 Portugal and Spain, but we did not find it neither for HADS nor EQ-5D. Moreover, the impact  
24  
25  
26 387 of the presence of specific comorbidities, such as rhinitis, which is closely associated both  
27  
28 388 with asthma and anxiety/depression, was not assessed [56]. Another limitation of the present  
29  
30  
31 389 study is related to its cross-sectional nature. The frequency of distressing symptoms and the  
32  
33 390 relationships with associated factors could not be established along the progression of the  
34  
35  
36 391 disease. Also, patients were not recruited at the same time point, as recruitment in the  
37  
38 392 Inspirers studies occurred across 4 different years (from 2017 to 2020), and the last 15% of  
39  
40  
41 393 the sample was recruited during COVID-19 pandemic. Longitudinal studies following a cohort  
42  
43 394 of patients with asthma would address these issues and identify other predictors of symptoms  
44  
45 395 of anxiety and depression.  
46  
47

48 396 This study shows that more than 30% of the patients with persistent asthma  
49  
50  
51 397 experience symptoms of anxiety/depression, which supports the relevance of emotional  
52  
53 398 distress screening in patients with asthma. The study also showed that for screening  
54  
55  
56 399 purposes, it is possible to use either EQ-5D and HADS questionnaires.  
57  
58

59 400  
60

## 401 **a. Contributorship statement**

402 All authors contributed to the selection of bibliography, revision and final approval of the  
403 manuscript. AMP, RA, MAC, RAlmeida, JAF and CJ were responsible for study conception and  
404 design; RA, AMP, RAlmeida, MAC, CCL, CL, JC, CR, CV, DAA, DP, MFM, MJV, CLozoya, NS, FC,  
405 LTB, RF, PMS, TMF, RC, ES, DB, CG, MJC, SS, MLM, AM, CN, CVieira, RP, AA, JVM, BR, LM, RM,  
406 MC, BV, DSC, SF, PM, MAA, ARM, JAF and CJ participated in the data collection; CJ and AMP  
407 performed the data analysis and MSC prepared the first draft. All authors contributed to the  
408 interpretation of data, to the critical revision of the manuscript for important intellectual  
409 content.

## 410 **b. Competing interests**

411 None

## 412 **c. Funding**

413 This study is a secondary analysis from the mINSPIRE project financed by national funds  
414 through the Foundation for Science and Technology (PTDC/MEC-OUT/29130/2017) and co-  
415 financed by Operational Programme “Competitiveness and Internationalization” (COMPETE  
416 2020), PORTUGAL 2020 from European Regional Development Fund - FEDER (POCI-01-0145-  
417 FEDER-029130).

## 418 **d. Data sharing statement**

419 The data sets generated during and/or analysed during the current study are not publicly available.

## 420 **Ethics approval**

1  
2  
3 421 The studies were approved by the ethics committees of all participating centres. For example, the  
4  
5 422 study was approved by the Ethics Committee of Centro Hospitalar de S. João—EPE (protocol code 258-  
6  
7 423 17 and date of approval: 5th of January 2018).

## 10 424 **References**

- 14 425 1. Nanda, A. and A.N. Wasan, *Asthma in Adults*. Med Clin North Am, 2020. **104**(1): p. 95-108.
- 15 426 2. Sa-Sousa, A., et al., *Prevalence of asthma in Portugal - The Portuguese National Asthma*  
16 427 *Survey*. Clin Transl Allergy, 2012. **2**(1): p. 15.
- 17 428 3. Cisneros, C., et al., *Accreditation of specialized asthma units for adults in Spain: an applicable*  
18 429 *experience for the management of difficult-to-control asthma*. J Asthma Allergy, 2017. **10**: p.  
20 430 163-169.
- 21 431 4. Mims, J.W., *Asthma: definitions and pathophysiology*. Int Forum Allergy Rhinol, 2015. **5**  
22 432 **Suppl 1**: p. S2-6.
- 23 433 5. Porsbjerg, C. and A. Menzies-Gow, *Co-morbidities in severe asthma: Clinical impact and*  
24 434 *management*. Respirology, 2017. **22**(4): p. 651-661.
- 25 435 6. Ye, G., D.S. Baldwin, and R. Hou, *Anxiety in asthma: a systematic review and meta-analysis*.  
26 436 Psychological Medicine, 2021. **51**(1): p. 11-20.
- 27 437 7. Weiser, E.B., *The Prevalence of Anxiety Disorders Among Adults with Asthma: A Meta-*  
28 438 *Analytic Review*. Journal of Clinical Psychology in Medical Settings, 2007. **14**(4): p. 297-307.
- 29 439 8. Opolski, M. and I. Wilson, *Asthma and depression: a pragmatic review of the literature and*  
30 440 *recommendations for future research*. Clin Pract Epidemiol Ment Health, 2005. **1**: p. 18.
- 31 441 9. Clark, V.L., et al., *Multidimensional assessment of severe asthma: A systematic review and*  
32 442 *meta-analysis*. Respirology, 2017. **22**(7): p. 1262-1275.
- 33 443 10. Lomper, K., et al., *Effects of depression and anxiety on asthma-related quality of life*.  
34 444 Pneumonol Alergol Pol, 2016. **84**(4): p. 212-21.
- 35 445 11. Sastre, J., et al., *Anxiety, Depression, and Asthma Control: Changes After Standardized*  
36 446 *Treatment*. J Allergy Clin Immunol Pract, 2018. **6**(6): p. 1953-1959.
- 37 447 12. Li, H.L., et al., *Anxiety but not depression symptoms are associated with greater perceived*  
38 448 *dyspnea in asthma during bronchoconstriction*. Allergy Asthma Proc, 2015. **36**(6): p. 447-57.
- 39 449 13. McCauley, E., et al., *Impact of anxiety and depression on functional impairment in*  
40 450 *adolescents with asthma*. Gen Hosp Psychiatry, 2007. **29**(3): p. 214-22.
- 41 451 14. Annunziata, M.A., et al., *Hospital Anxiety and Depression Scale (HADS) accuracy in cancer*  
42 452 *patients*. Support Care Cancer, 2020. **28**(8): p. 3921-3926.
- 43 453 15. Licari, A., et al., *Anxiety and depression in adolescents with asthma: a study in clinical*  
44 454 *practice*. Acta Biomed, 2022. **93**(1): p. e2022021.
- 45 455 16. Labor, M., et al., *Long-term predictors of anxiety and depression in adult patients with*  
46 456 *asthma*. Wien Klin Wochenschr, 2017. **129**(19-20): p. 665-673.
- 47 457 17. Snaith, R.P., *The Hospital Anxiety And Depression Scale*. Health Qual Life Outcomes, 2003. **1**:  
48 458 p. 29.
- 49 459 18. Mitchell, A.J., *Screening for cancer-related distress: when is implementation successful and*  
50 460 *when is it unsuccessful?* Acta Oncol, 2013. **52**(2): p. 216-24.
- 51 461 19. Turon, H., et al., *Agreement between a single-item measure of anxiety and depression and*  
52 462 *the Hospital Anxiety and Depression Scale: A cross-sectional study*. PLoS One, 2019. **14**(1): p.  
53 463 e0210111.
- 54 464 20. Rabin, R. and F. de Charro, *EQ-5D: a measure of health status from the EuroQol Group*. Ann  
55 465 Med, 2001. **33**(5): p. 337-43.



- 1  
2  
3 466 21. Chotai, S., et al., *Utility of Anxiety/Depression Domain of EQ-5D to Define Psychological*  
4 467 *Distress in Spine Surgery*. *World Neurosurg*, 2019. **126**: p. e1075-e1080.
- 5 468 22. Afshari, S., et al., *Health related quality of life in adults with asthma: a systematic review to*  
6 469 *identify the values of EQ-5D-5L instrument*. *Journal of Asthma*, 2021: p. 1-10.
- 7 470 23. Whynes, D.K., *Responsiveness of the EQ-5D to HADS-identified anxiety and depression*. *J Eval*  
8 471 *Clin Pract*, 2009. **15**(5): p. 820-5.
- 9 472 24. Jácome, C., et al., *MINSPIRERS – Feasibility of a mobile application to measure and improve*  
10 473 *adherence to inhaled controller medications among adolescents and adults with persistent*  
11 474 *asthma: Protocol for a multicentre observational study*. *Revista Portuguesa de*  
12 475 *Imunoalergologia*, 2018. **26**: p. 47-61.
- 13 476 25. Vandembroucke, J.P., et al., *Strengthening the Reporting of Observational Studies in*  
14 477 *Epidemiology (STROBE): explanation and elaboration*. *Int J Surg*, 2014. **12**(12): p. 1500-24.
- 15 478 26. Fonseca, J.A., et al., *Validation of a questionnaire (CARAT10) to assess rhinitis and asthma in*  
16 479 *patients with asthma*. *Allergy*, 2010. **65**(8): p. 1042-8.
- 17 480 27. Pais-Ribeiro, J., et al., *Validation study of a Portuguese version of the Hospital Anxiety and*  
18 481 *Depression Scale*. *Psychol Health Med*, 2007. **12**(2): p. 225-35; quiz 235-7.
- 19 482 28. Bjelland, I., et al., *The validity of the Hospital Anxiety and Depression Scale. An updated*  
20 483 *literature review*. *J Psychosom Res*, 2002. **52**(2): p. 69-77.
- 21 484 29. Short, H., et al., *The performance of the EQ-5D-3L in screening for anxiety and depressive*  
22 485 *symptoms in hospital and community settings*. *Health Qual Life Outcomes*, 2021. **19**(1): p.  
23 486 96.
- 24 487 30. Ferreira, P.L., L.N. Ferreira, and L.N. Pereira, *[Contribution for the validation of the*  
25 488 *Portuguese version of EQ-5D]*. *Acta Med Port*, 2013. **26**(6): p. 664-75.
- 26 489 31. Azevedo, L., et al., *Validity and reliability of EQ5D questionnaire in critically ill patients*.  
27 490 *Critical Care Medicine*, 2007. **35**: p. 619.
- 28 491 32. Gabbe, B.J., et al., *Level of agreement between patient-reported EQ-5D responses and EQ-5D*  
29 492 *responses mapped from the SF-12 in an injury population*. *Popul Health Metr*, 2015. **13**: p.  
30 493 14.
- 31 494 33. Cooper, C.L., et al., *Anxiety and panic fear in adults with asthma: prevalence in primary care*.  
32 495 *BMC Fam Pract*, 2007. **8**: p. 62.
- 33 496 34. McDonald, V.M., et al., *Treatable traits can be identified in a severe asthma registry and*  
34 497 *predict future exacerbations*. *Respirology*, 2019. **24**(1): p. 37-47.
- 35 498 35. Folkman, S., *Stress: Appraisal and Coping*, in *Encyclopedia of Behavioral Medicine*, M.D.  
36 499 Gellman and J.R. Turner, Editors. 2013, Springer New York: New York, NY. p. 1913-1915.
- 37 500 36. Akula, M., et al., *The relationship between asthma and depression in a community-based*  
38 501 *sample*. *J Asthma*, 2018. **55**(12): p. 1271-1277.
- 39 502 37. Amelink, M., et al., *Anxiety, depression and personality traits in severe, prednisone-*  
40 503 *dependent asthma*. *Respir Med*, 2014. **108**(3): p. 438-44.
- 41 504 38. Goodwin, R.D., D.M. Fergusson, and L.J. Horwood, *Asthma and depressive and anxiety*  
42 505 *disorders among young persons in the community*. *Psychol Med*, 2004. **34**(8): p. 1465-74.
- 43 506 39. Ferro, M.A., et al., *Condition-specific associations of symptoms of depression and anxiety in*  
44 507 *adolescents and young adults with asthma and food allergy*. *J Asthma*, 2016. **53**(3): p. 282-8.
- 45 508 40. Lee, Y.C., et al., *Association of asthma and anxiety: A nationwide population-based study in*  
46 509 *Taiwan*. *J Affect Disord*, 2016. **189**: p. 98-105.
- 47 510 41. Ilmarinen, P., L.E. Tuomisto, and H. Kankaanranta, *Phenotypes, Risk Factors, and*  
48 511 *Mechanisms of Adult-Onset Asthma*. *Mediators Inflamm*, 2015. **2015**: p. 514868.
- 49 512 42. Burdon, J., *Adult-onset asthma*. *Aust Fam Physician*, 2015. **44**(8): p. 554-7.
- 50 513 43. Dunn, R.M., P.J. Busse, and M.E. Wechsler, *Asthma in the elderly and late-onset adult*  
51 514 *asthma*. *Allergy*, 2018. **73**(2): p. 284-294.
- 52 515 44. Katz, P.P., et al., *Onset of depressive symptoms among adults with asthma: results from a*  
53 516 *longitudinal observational cohort*. *Prim Care Respir J*, 2010. **19**(3): p. 223-30.



- 1  
2  
3 517 45. Altemus, M., *Sex differences in depression and anxiety disorders: potential biological*  
4 518 *determinants*. *Horm Behav*, 2006. **50**(4): p. 534-8.
- 5 519 46. Baxter, A.J., et al., *Global prevalence of anxiety disorders: a systematic review and meta-*  
6 520 *regression*. *Psychol Med*, 2013. **43**(5): p. 897-910.
- 7 521 47. Cleland, J.A., A.J. Lee, and S. Hall, *Associations of depression and anxiety with gender, age,*  
8 522 *health-related quality of life and symptoms in primary care COPD patients*. *Fam Pract*, 2007.  
9 523 **24**(3): p. 217-23.
- 10 524 48. Di Marco, F., et al., *Close correlation between anxiety, depression, and asthma control*.  
11 525 *Respir Med*, 2010. **104**(1): p. 22-8.
- 12 526 49. Laforest, L., et al., *Influence of patients' characteristics and disease management on asthma*  
13 527 *control*. *J Allergy Clin Immunol*, 2006. **117**(6): p. 1404-10.
- 14 528 50. Szentes, B.L., et al., *How does the EQ-5D-5L perform in asthma patients compared with an*  
15 529 *asthma-specific quality of life questionnaire?* *BMC Pulm Med*, 2020. **20**(1): p. 168.
- 16 530 51. Jin, X., et al., *The EQ-5D-5L Is Superior to the -3L Version in Measuring Health-related Quality*  
17 531 *of Life in Patients Awaiting THA or TKA*. *Clin Orthop Relat Res*, 2019. **477**(7): p. 1632-1644.
- 18 532 52. König, H.H., et al., *Validity and responsiveness of the EQ-5D in assessing and valuing health*  
19 533 *status in patients with anxiety disorders*. *Health Qual Life Outcomes*, 2010. **8**: p. 47.
- 20 534 53. Whalley, D., et al., *Is the EQ-5D fit for purpose in asthma? Acceptability and content validity*  
21 535 *from the patient perspective*. *Health Qual Life Outcomes*, 2018. **16**(1): p. 160.
- 22 536 54. Yorke, J., S.L. Fleming, and C. Shuldham, *Psychological interventions for adults with asthma:*  
23 537 *a systematic review*. *Respir Med*, 2007. **101**(1): p. 1-14.
- 24 538 55. Stoop, C.H., et al., *Effectiveness of a stepped care intervention for anxiety and depression in*  
25 539 *people with diabetes, asthma or COPD in primary care: A randomized controlled trial*. *J Affect*  
26 540 *Disord*, 2015. **184**: p. 269-76.
- 27 541 56. Rodrigues, J., et al., *Allergic Rhinitis Seasonality, Severity, and Disease Control Influence*  
28 542 *Anxiety and Depression*. *Laryngoscope*, 2022.

543

## 1 Supplementary table 1 – Univariate analyses to explain anxiety and depression symptoms.

|                                                                                   | <b>Anxiety</b>           | <b>Depression</b>        |
|-----------------------------------------------------------------------------------|--------------------------|--------------------------|
|                                                                                   | <b>crude OR (95% CI)</b> | <b>crude OR (95% CI)</b> |
| <b>Age</b>                                                                        | 1.02 (1.01-1.03)         | 1.05 (1.03-1.06)         |
| <b>Age group</b>                                                                  |                          |                          |
| Adolescent                                                                        | 0.39 (0.26-0.59)         | 0.39 (0.19-0.78)         |
| Adult                                                                             | Reference                | Reference                |
| <b>Gender</b>                                                                     |                          |                          |
| Females                                                                           | 2.44 (1.68-3.53)         | 1.64 (0.95-2.85)         |
| Males                                                                             | Reference                | Reference                |
| <b>Educational level</b>                                                          |                          |                          |
| No education completed/Primary school                                             | 0.99 (0.71-1.39)         | 1.67 (1.01-2.74)         |
| High school/Qualification above high school (but not university)/University/Other | Reference                | Reference                |
| <b>Marital status</b>                                                             |                          |                          |
| Single/ Separated/Divorced/Widowed                                                | 0.72 (0.52-1.02)         | 0.45 (0.27-0.74)         |
| Married/Living as a couple                                                        | Reference                | Reference                |
| <b>Current occupation</b>                                                         |                          |                          |
| Employed/Student/Other                                                            | 0.55 (0.35-0.87)         | 0.25 (0.14-0.43)         |
| Unemployed/Retired                                                                | Reference                | Reference                |
| <b>BMI</b>                                                                        | 1.03 (0.99-1.06)         | 1.08 (1.04-1.13)         |
| <b>Smoking status</b>                                                             |                          |                          |
| Non-smokers                                                                       | 0.56 (0.31-1.02)         | 0.92 (0.37-2.24)         |
| Smokers                                                                           | Reference                | Reference                |
| <b>Setting</b>                                                                    |                          |                          |
| Primary care                                                                      | 1.60 (1.09-2.35)         | 1.04 (0.58-1.86)         |
| Secondary care                                                                    | Reference                | Reference                |
| <b>Age of asthma diagnosis</b>                                                    | 1.02 (1.01-1.03)         | 1.04 (1.03-1.06)         |
| <b>Number of physician-reported comorbidities</b>                                 | 1.32 (1.14-1.53)         | 1.55 (1.29-1.87)         |
| <b>Number of prescribed inhalers</b>                                              | 1.29 (0.97-1.71)         | 1.29 (0.87-1.91)         |
| <b>GINA assessment symptom control</b>                                            |                          |                          |
| Well controlled                                                                   | 0.61 (0.44-0.85)         | 0.51 (0.30-0.85)         |
| Partly controlled/Uncontrolled                                                    | Reference                | Reference                |
| <b>CARAT T</b>                                                                    | 0.93 (0.91-0.96)         | 0.91 (0.88-0.95)         |
| <b>Quality of life (EQ-5D total)</b>                                              | 0.94 (0.92-0.95)         | 0.94 (0.93-0.96)         |
| <b>Perception of better health (EQ-5D VAS)</b>                                    | 0.96 (0.95-0.97)         | 0.96 (0.95-0.97)         |

2 OR = Odds ratio; CI= Confidence interval; BMI=body mass index; GINA = Global Initiative for Asthma; CARAT-T=Control of Allergic Rhinitis  
3 and Asthma Test total score; EQ-5D= European Quality of Life Five Dimension Questionnaire.

STROBE Statement—Checklist of items that should be included in reports of *cohort studies*

|                              | Item No | Recommendation                                                                                                                                                                                                                                                                                                         | Page No                               |
|------------------------------|---------|------------------------------------------------------------------------------------------------------------------------------------------------------------------------------------------------------------------------------------------------------------------------------------------------------------------------|---------------------------------------|
| <b>Title and abstract</b>    | 1       | (a) Indicate the study's design with a commonly used term in the title or the abstract<br>(b) Provide in the abstract an informative and balanced summary of what was done and what was found                                                                                                                          | 3<br>3                                |
| <b>Introduction</b>          |         |                                                                                                                                                                                                                                                                                                                        |                                       |
| Background/rationale         | 2       | Explain the scientific background and rationale for the investigation being reported                                                                                                                                                                                                                                   | 6-7                                   |
| Objectives                   | 3       | State specific objectives, including any prespecified hypotheses                                                                                                                                                                                                                                                       | 7                                     |
| <b>Methods</b>               |         |                                                                                                                                                                                                                                                                                                                        |                                       |
| Study design                 | 4       | Present key elements of study design early in the paper                                                                                                                                                                                                                                                                | 7                                     |
| Setting                      | 5       | Describe the setting, locations, and relevant dates, including periods of recruitment, exposure, follow-up, and data collection                                                                                                                                                                                        | 8                                     |
| Participants                 | 6       | (a) Give the eligibility criteria, and the sources and methods of selection of participants. Describe methods of follow-up<br>(b) For matched studies, give matching criteria and number of exposed and unexposed                                                                                                      | 8<br>NA                               |
| Variables                    | 7       | Clearly define all outcomes, exposures, predictors, potential confounders, and effect modifiers. Give diagnostic criteria, if applicable                                                                                                                                                                               | 8-9                                   |
| Data sources/<br>measurement | 8*      | For each variable of interest, give sources of data and details of methods of assessment (measurement). Describe comparability of assessment methods if there is more than one group                                                                                                                                   | 8-9                                   |
| Bias                         | 9       | Describe any efforts to address potential sources of bias                                                                                                                                                                                                                                                              | NA                                    |
| Study size                   | 10      | Explain how the study size was arrived at                                                                                                                                                                                                                                                                              | NA                                    |
| Quantitative variables       | 11      | Explain how quantitative variables were handled in the analyses. If applicable, describe which groupings were chosen and why                                                                                                                                                                                           | 10                                    |
| Statistical methods          | 12      | (a) Describe all statistical methods, including those used to control for confounding<br>(b) Describe any methods used to examine subgroups and interactions<br>(c) Explain how missing data were addressed<br>(d) If applicable, explain how loss to follow-up was addressed<br>(e) Describe any sensitivity analyses | 10<br>10<br>10<br>NA<br>NA            |
| <b>Results</b>               |         |                                                                                                                                                                                                                                                                                                                        |                                       |
| Participants                 | 13*     | (a) Report numbers of individuals at each stage of study—eg numbers potentially eligible, examined for eligibility, confirmed eligible, included in the study, completing follow-up, and analysed<br>(b) Give reasons for non-participation at each stage<br>(c) Consider use of a flow diagram                        | 11<br>NA<br>NA                        |
| Descriptive data             | 14*     | (a) Give characteristics of study participants (eg demographic, clinical, social) and information on exposures and potential confounders<br>(b) Indicate number of participants with missing data for each variable of interest<br>(c) Summarise follow-up time (eg, average and total amount)                         | 11,<br>table<br>1<br>Table<br>1<br>NA |
| Outcome data                 | 15*     | Report numbers of outcome events or summary measures over time                                                                                                                                                                                                                                                         | NA                                    |

|    |                          |    |                                                                                                                                                                                                              |       |
|----|--------------------------|----|--------------------------------------------------------------------------------------------------------------------------------------------------------------------------------------------------------------|-------|
| 1  | Main results             | 16 | (a) Give unadjusted estimates and, if applicable, confounder-adjusted estimates and their precision (eg, 95% confidence interval). Make clear which confounders were adjusted for and why they were included | 11-12 |
| 2  |                          |    | (b) Report category boundaries when continuous variables were categorized                                                                                                                                    | 11-12 |
| 3  |                          |    | (c) If relevant, consider translating estimates of relative risk into absolute risk for a meaningful time period                                                                                             | NA    |
| 4  | Other analyses           | 17 | Report other analyses done—eg analyses of subgroups and interactions, and sensitivity analyses                                                                                                               | NA    |
| 5  | <b>Discussion</b>        |    |                                                                                                                                                                                                              |       |
| 6  | Key results              | 18 | Summarise key results with reference to study objectives                                                                                                                                                     | 12    |
| 7  | Limitations              | 19 | Discuss limitations of the study, taking into account sources of potential bias or imprecision. Discuss both direction and magnitude of any potential bias                                                   | 15-16 |
| 8  | Interpretation           | 20 | Give a cautious overall interpretation of results considering objectives, limitations, multiplicity of analyses, results from similar studies, and other relevant evidence                                   | 12-15 |
| 9  | Generalisability         | 21 | Discuss the generalisability (external validity) of the study results                                                                                                                                        | 16    |
| 10 | <b>Other information</b> |    |                                                                                                                                                                                                              |       |
| 11 | Funding                  | 22 | Give the source of funding and the role of the funders for the present study and, if applicable, for the original study on which the present article is based                                                | 4     |

\*Give information separately for exposed and unexposed groups.

**Note:** An Explanation and Elaboration article discusses each checklist item and gives methodological background and published examples of transparent reporting. The STROBE checklist is best used in conjunction with this article (freely available on the Web sites of PLoS Medicine at <http://www.plosmedicine.org/>, Annals of Internal Medicine at <http://www.annals.org/>, and Epidemiology at <http://www.epidem.com/>). Information on the STROBE Initiative is available at <http://www.strobe-statement.org>.

# BMJ Open

## Symptoms of anxiety and depression in patients with persistent asthma: a cross-sectional analysis of the INSPIRERS studies

|                               |                                                                                                                                                                                                                                                                                                                                                                                                                                                                                                                                                                                                                                                                                                                                                                                                                                                                                                                                                                                                                                                                                                                                                                                                                                                                                                                                                                                                                                                                                                                                                                                                                                                                                                                                                                                                                                                                                                                                                                                                                                                                                                                                                                                                                                                                                |
|-------------------------------|--------------------------------------------------------------------------------------------------------------------------------------------------------------------------------------------------------------------------------------------------------------------------------------------------------------------------------------------------------------------------------------------------------------------------------------------------------------------------------------------------------------------------------------------------------------------------------------------------------------------------------------------------------------------------------------------------------------------------------------------------------------------------------------------------------------------------------------------------------------------------------------------------------------------------------------------------------------------------------------------------------------------------------------------------------------------------------------------------------------------------------------------------------------------------------------------------------------------------------------------------------------------------------------------------------------------------------------------------------------------------------------------------------------------------------------------------------------------------------------------------------------------------------------------------------------------------------------------------------------------------------------------------------------------------------------------------------------------------------------------------------------------------------------------------------------------------------------------------------------------------------------------------------------------------------------------------------------------------------------------------------------------------------------------------------------------------------------------------------------------------------------------------------------------------------------------------------------------------------------------------------------------------------|
| Journal:                      | <i>BMJ Open</i>                                                                                                                                                                                                                                                                                                                                                                                                                                                                                                                                                                                                                                                                                                                                                                                                                                                                                                                                                                                                                                                                                                                                                                                                                                                                                                                                                                                                                                                                                                                                                                                                                                                                                                                                                                                                                                                                                                                                                                                                                                                                                                                                                                                                                                                                |
| Manuscript ID                 | bmjopen-2022-068725.R1                                                                                                                                                                                                                                                                                                                                                                                                                                                                                                                                                                                                                                                                                                                                                                                                                                                                                                                                                                                                                                                                                                                                                                                                                                                                                                                                                                                                                                                                                                                                                                                                                                                                                                                                                                                                                                                                                                                                                                                                                                                                                                                                                                                                                                                         |
| Article Type:                 | Original research                                                                                                                                                                                                                                                                                                                                                                                                                                                                                                                                                                                                                                                                                                                                                                                                                                                                                                                                                                                                                                                                                                                                                                                                                                                                                                                                                                                                                                                                                                                                                                                                                                                                                                                                                                                                                                                                                                                                                                                                                                                                                                                                                                                                                                                              |
| Date Submitted by the Author: | 17-Feb-2023                                                                                                                                                                                                                                                                                                                                                                                                                                                                                                                                                                                                                                                                                                                                                                                                                                                                                                                                                                                                                                                                                                                                                                                                                                                                                                                                                                                                                                                                                                                                                                                                                                                                                                                                                                                                                                                                                                                                                                                                                                                                                                                                                                                                                                                                    |
| Complete List of Authors:     | <p>Simões Cunha, Mafalda; CINTESIS<br/> Amaral, Rita; University of Porto, CINTESIS; Faculty of Medicine of University of Porto, Portugal<br/> Pereira, A. M.; CUF-Porto Hospital and Institute, Immunoallergy; CINTESIS<br/> Almeida, Rute; CINTESIS, MEDCIDS<br/> Alves-Correia, Magna; CINTESIS; Hospital CUF, Allergy Unit<br/> Loureiro, Cláudia Chaves; Coimbra University Hospital,, Pneumology<br/> Lopes, Cristina; FMUP, Basic and Clinic Immunology; Hospital Pedro Hispano, immuno-allergy<br/> Carvalho, Joana; Unidade Local de Saúde de Matosinhos EPE, Serviço de Pediatria<br/> Ribeiro, Carmelita; Centro Hospitalar e Universitário de Coimbra EPE, Serviço de Imunoalergologia, Hospital Universitário de Coimbra<br/> Vidal, Carmen; Complejo Hospitalario Universitario, Department of Medicine<br/> Antolín-Amérigo, Dario; Hospital Universitario Ramón y Cajal, Servicio de Alergia<br/> Pinto, Diana; Centro Hospitalar Universitário do Porto EPE Centro Materno-Infantil do Norte Dr Albino Aroso, Serviço de Pediatria<br/> Ferreira-Magalhães, Manuel; CINTESIS, MEDCIDS; Centro Hospitalar Universitário do Porto EPE Centro Materno-Infantil do Norte Dr Albino Aroso, Serviço de pediatria<br/> Vasconcelos, Maria João; Hospital São João, immuno-allergy<br/> Lozoya, Carlos ; Hospital Amato Lusitano, Allergy<br/> Santos, Natacha; Centro Hospitalar do Algarve EPE, immuno-allergy<br/> Cardia , Francisca; Unidade de Saúde Familiar Terras de Azurara<br/> Taborda-Barata, Luís; CICS - Health Sciences Research Centre; NuESA – Environment &amp; Health Study Group, Faculty of Health Sciences, University of Beira Interior; Department of Allergy &amp; Clinical Immunology, Cova da Beira University Hospital Centre<br/> Ferreira, Rosário ; Centro Hospitalar de Lisboa Norte, Serviço de Pediatria<br/> Morais Silva, Pedro ; Grupo HPA Saúde, Immuno-Allergy<br/> Ferreira, Tania; Agrupamento de Centros de Saúde Baixo Mondego<br/> Câmara, Raquel; Centro Hospitalar Barreiro Montijo EPE<br/> Silva, Eurico; Agrupamento de Centros de Saúde de Baixo Vouga<br/> Bordalo, Diana; Centro Hospitalar do Médio Ave EPE, Serviço de Pediatria<br/> Guimarães , Cristina; Agrupamento de Centros de Saúde Pinhal Litoral</p> |

|                                 |                                                                                                                                                                                                                                                                                                                                                                                                                                                                                                                                                                                                                                                                                                                                                                                                                                                                                                                                                                                                                                                                                                                                                                                                                                                                                                                                                                                                                                                                                           |
|---------------------------------|-------------------------------------------------------------------------------------------------------------------------------------------------------------------------------------------------------------------------------------------------------------------------------------------------------------------------------------------------------------------------------------------------------------------------------------------------------------------------------------------------------------------------------------------------------------------------------------------------------------------------------------------------------------------------------------------------------------------------------------------------------------------------------------------------------------------------------------------------------------------------------------------------------------------------------------------------------------------------------------------------------------------------------------------------------------------------------------------------------------------------------------------------------------------------------------------------------------------------------------------------------------------------------------------------------------------------------------------------------------------------------------------------------------------------------------------------------------------------------------------|
|                                 | <p>Calix, Maria José; Centro Hospitalar Tondela Viseu EPE da Silva, Sofia; Unidade Local de Saúde do Alto Minho EPE Marques, Maria; Senhora da Oliveira Hospital Guimaraes, Serviço de Imunoalergologia</p> <p>Morete, Ana; Hospital CUF, Allergy Unit; Baixo Vouga Hospital Centre Nunes, Carlos; Centro de Imunoalergologia do Algarve Vieira, Cláudia; Agrupamento de Centros de Saúde Douro I - Marão e Douro Norte</p> <p>Páscoa, Rosália; Faculty of Medicine, University of Porto, Department of Community Medicine, Information and Health Decision Sciences (MEDCIDS) and Centre for Health Technology and Services Research (CINTESIS), University of Porto, Porto, Portugal.</p> <p>Alves, Adelaide; Vila Nova de Gaia Espinho Hospital Center, Serviço de Pneumologia</p> <p>Marques, José ; Agrupamento de Centros de Saúde do Dão Lafões Reis, Bruno; Agrupamento de Centros de Saúde Pinhal Litoral Monteiro, Luís; CINTESIS, ; USF Esgueira +, Monteiro, Rosário; CINTESIS, MEDCIDS; ACeS Porto Ocidental Cepa, Margarida; ACES Pinhal Litoral Valentim, Bruno; ACES Baixo Mondego Coelho, Daniela; ACES Tâmega I - Baixo Tâmega Fernandes, Sara; ACES Cávado I Meireles, Patrícia; ACES Douro II - Douro Sul Aguiar, Margarida; ACES Grande Porto III - Maia / Valongo Mourão, Ana; ACES Grande Porto VIII - Espinho / Gaia Fonseca, Joao A.; CINTESIS, MEDCIDS; Instituto and Hospital CUF, Allergy Unit Jácome, Cristina; University of Porto, Faculty of Medicine</p> |
| <b>Primary Subject Heading</b>: | Respiratory medicine                                                                                                                                                                                                                                                                                                                                                                                                                                                                                                                                                                                                                                                                                                                                                                                                                                                                                                                                                                                                                                                                                                                                                                                                                                                                                                                                                                                                                                                                      |
| Secondary Subject Heading:      | Mental health                                                                                                                                                                                                                                                                                                                                                                                                                                                                                                                                                                                                                                                                                                                                                                                                                                                                                                                                                                                                                                                                                                                                                                                                                                                                                                                                                                                                                                                                             |
| Keywords:                       | Asthma < THORACIC MEDICINE, Anxiety disorders < PSYCHIATRY, Depression & mood disorders < PSYCHIATRY                                                                                                                                                                                                                                                                                                                                                                                                                                                                                                                                                                                                                                                                                                                                                                                                                                                                                                                                                                                                                                                                                                                                                                                                                                                                                                                                                                                      |
|                                 |                                                                                                                                                                                                                                                                                                                                                                                                                                                                                                                                                                                                                                                                                                                                                                                                                                                                                                                                                                                                                                                                                                                                                                                                                                                                                                                                                                                                                                                                                           |

SCHOLARONE™  
Manuscripts

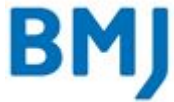

I, the Submitting Author has the right to grant and does grant on behalf of all authors of the Work (as defined in the below author licence), an exclusive licence and/or a non-exclusive licence for contributions from authors who are: i) UK Crown employees; ii) where BMJ has agreed a CC-BY licence shall apply, and/or iii) in accordance with the terms applicable for US Federal Government officers or employees acting as part of their official duties; on a worldwide, perpetual, irrevocable, royalty-free basis to BMJ Publishing Group Ltd ("BMJ") its licensees and where the relevant Journal is co-owned by BMJ to the co-owners of the Journal, to publish the Work in this journal and any other BMJ products and to exploit all rights, as set out in our [licence](#).

The Submitting Author accepts and understands that any supply made under these terms is made by BMJ to the Submitting Author unless you are acting as an employee on behalf of your employer or a postgraduate student of an affiliated institution which is paying any applicable article publishing charge ("APC") for Open Access articles. Where the Submitting Author wishes to make the Work available on an Open Access basis (and intends to pay the relevant APC), the terms of reuse of such Open Access shall be governed by a Creative Commons licence – details of these licences and which [Creative Commons](#) licence will apply to this Work are set out in our licence referred to above.

Other than as permitted in any relevant BMJ Author's Self Archiving Policies, I confirm this Work has not been accepted for publication elsewhere, is not being considered for publication elsewhere and does not duplicate material already published. I confirm all authors consent to publication of this Work and authorise the granting of this licence.

## Title

# Symptoms of anxiety and depression in patients with persistent asthma: a cross-sectional analysis of the INSPIRERS studies

Mafalda Simões Cunha 1; Rita Amaral 2,3,4,5; Ana Margarida Pereira 1,2,6; Rute Almeida 3; Magna Alves-Correia M 1,2; Cláudia Chaves-Loureiro 7; Cristina Lopes 8,9; Joana Carvalho 10; Carmelita Ribeiro 11; Carmen Vidal 12, Darío Antolín-Amérigo 13, Diana Pinto 14; Manuel Ferreira-Magalhães 3,14; Maria João Vasconcelos 15; Carlos Lozoya 16; Natacha Santos 17; Francisca Cardia 18; Luís Taborda-Barata 19,20; Rosário Ferreira 21; Pedro Morais Silva 22; Tania Monteiro Ferreira 23; Raquel Camara 24; Eurico Silva 25; Diana Bordalo 26; Cristina Guimarães 27; Maria José Cálix 28; Sofia da Silva 29; Maria Luís Marques 30; Ana Morete 2, 31; Carlos Nunes 32; Cláudia Vieira 33; Rosália Páscoa 1,6,34; Adelaide Alves 35; José Varanda Marques 36; Bruno Reis 37; Luís Monteiro 1,38; Rosário Monteiro 3,34; Margarida Cepa 39; Bruno Valentim 40; Daniela Sousa Coelho 41; Sara Fernandes 42; Patrícia Meireles 43; Margarida Abreu Aguiar 44; Ana Rita Mourão 45; João Almeida Fonseca 2,3,46; Cristina Jácome 3, INSPIRERS group

1. Center for Health Technology and Services Research (CINTESIS), Faculty of Medicine, University of Porto, Porto , PT
2. Allergy Unit, Instituto and Hospital CUF , Porto , PT
3. CINTESIS@RISE, MEDCIDS, Faculty of Medicine of the University of Porto, Porto, Portugal
4. Department of Cardiovascular and Respiratory Sciences, Porto Health School, Polytechnic Institute of Porto, Porto , PT
5. Department of Women's and Children's Health, Paediatric Research, Uppsala University, Uppsala , SE
6. Department of Community Medicine, Information and Health Decision Sciences (MEDCIDS), Faculty of Medicine, University of Porto, Porto , PT
7. Pulmonology Department, Hospitais da Universidade de Coimbra, Centro Hospitalar e Universitário de Coimbra, Coimbra, Portugal; Clinical Academic Center of Coimbra, Portugal.
8. Imunologia Básica e Clínica, Faculdade de Medicina, Universidade do Porto, Porto , PT
9. Unidade de Imunoalergologia, Hospital Pedro Hispano, Unidade Local de Saúde de Matosinhos, Matosinhos , PT
10. Serviço de Pediatria, Hospital Pedro Hispano, Unidade Local de Saúde de Matosinhos, Matosinhos , PT
11. Serviço de Imunoalergologia, Centro Hospitalar e Universitário de Coimbra , Coimbra , PT
12. Servicio de Alergia, Complejo Hospitalario Universitario de Santiago, Santiago de Compostela, Spain
13. Servicio de Alergia, Hospital Universitario Ramón y Cajal, Instituto Ramón y Cajal de Investigación Sanitaria, Madrid, Spain
14. Serviço de Pediatria, Centro Materno Infantil do Norte, Centro Hospitalar Universitário do Porto, Porto , PT
15. Serviço de Imunoalergologia, Centro Hospitalar Universitário de São João , Porto , PT
16. Serviço de Imunoalergologia, Hospital Amato Lusitano, Unidade Local de Saúde de Castelo Branco, Castelo Branco , PT
17. Serviço de Imunoalergologia, Centro Hospitalar Universitário do Algarve , Portimão , PT
18. Unidade de Saúde Familiar Terras de Azurara, Agrupamento de Centros de Saúde Dão Lafões , Mangualde , PT
19. Department of Allergy & Clinical Immunology, Cova da Beira University Hospital Centre , Covilhã , PT



- 1  
2  
3 48 20. CICS-UBI Centro de Investigação em Ciências da Saúde - Health Sciences Research Centre &  
4 49 UBI Air – Clinical & Experimental Lung Centre, University of Beira Interior, Covilhã , PT  
5 50 21. Departamento de Pediatria, Hospital de Santa Maria, Centro Hospitalar de Lisboa Norte, Lisboa,  
6 51 PT  
7 52 22. Imunoalergologia, Grupo HPA Saúde , Portimão , PT  
8 53 23. Unidade de Saúde Familiar Progresso e Saúde, Agrupamento de Centros de Saúde Baixo  
9 54 Mondego , Tocha , PT  
10 55 24. Serviço de Pneumologia, Hospital Nossa Senhora do Rosário, Centro Hospitalar Barreiro  
11 56 Montijo, Barreiro , PT  
12 57 25. Unidade de Saúde Familiar João Semana, Agrupamento de Centros de Saúde Baixo  
13 58 Vouga , Ovar , PT  
14 59 26. Serviço de Pediatria, Unidade Hospitalar de Famalicão, Centro Hospitalar do Médio Ave, Vila  
15 60 Nova de Famalicão , PT  
16 61 27. Unidade de Cuidados de Saúde Personalizados Norte (Arnaldo Sampaio), Agrupamento de  
17 62 Centros de Saúde Pinhal Litoral, Monte Redondo, PT  
18 63 28. Serviço de Pediatria, Hospital de São Teotónio, Centro Hospitalar Tondela–Viseu, Viseu , PT  
19 64 29. Unidade de Saúde Familiar Cuidarte, Unidade Local de Saúde do Alto Minho , Portuzelo , PT  
20 65 30. Serviço de Imunoalergologia, Hospital da Senhora da Oliveira, Guimarães, PT  
21 66 31. Serviço de Imunoalergologia, Hospital Infante D Pedro, Centro Hospitalar Baixo  
22 67 Vouga, Aveiro , PT  
23 68 32. Imunoalergologia, Centro de Imunoalergologia do Algarve , Portimão , PT  
24 69 33. Unidade de Saúde Familiar Corgo, Agrupamentos de Centros de Saúde Douro I - Marão e Douro  
25 70 Norte , Vila Real , PT  
26 71 34. Unidade de Saúde Familiar Homem do Leme, ACeS Porto Ocidental, Porto, Portugal  
27 72 35. Serviço de Pneumologia, Unidade I, Centro Hospitalar Vila Nova de Gaia/Espinho, Vila Nova de  
28 73 Gaia , PT  
29 74 36. Unidade de Saúde Familiar Viseu-Cidade, Agrupamento de Centros de Saúde do Dão  
30 75 Lafões , Viseu , PT  
31 76 37. Unidade de Cuidados de Saúde Personalizados Sicó, Agrupamento de Centros de Saúde Pinhal  
32 77 Litoral , Leiria , PT  
33 78 38. Unidade de Saúde Familiar Esgueira+, ACES Baixo Vouga, Esgueira, Portugal  
34 79 39. Unidade de Saúde Familiar Marquês, ACES Pinhal Litoral, Pombal, Portugal  
35 80 40. Unidade de Saúde Familiar Condeixa, ACES Baixo Mondego, Condeixa-a-Nova, Portugal  
36 81 41. Unidade de Cuidados de Saúde Personalizados de Amarante, ACES Tâmega I – Baixo Tâmega,  
37 82 Amarante, Portugal  
38 83 42. Unidade de Saúde Familiar Bracara Augusta, ACES Cávado I – Braga, Braga, Portugal  
39 84 43. Unidade de Saúde Familiar Almedina, ACES Douro II - Douro Sul, Lamego, Portugal  
40 85 44. Unidade de Saúde Familiar Valongo, ACES Grande Porto III - Maia / Valongo, Valongo, Portugal  
41 86 45. Unidade de Saúde Familiar Canelas, ACES Grande Porto VIII - Espinho / Gaia, Vila Nova Gaia,  
42 87 Portugal  
43 88 46. MEDIDA – Medicina, Educação, Investigação, Desenvolvimento e Avaliação, Porto, Portugal  
44 89

48 90 **Corresponding author:** Cristina Jácome, Center for Health Technology and Services Research

49 91 (CINTESIS), Department of Community Medicine, Information and Health Decision Sciences

50 92 (MEDCIDS), Faculty of Medicine, University of Porto, Portugal; e-mail:

51 93 [cristinajacome.ft@gmail.com](mailto:cristinajacome.ft@gmail.com)

52 94

## 95 **Abstract**

96 **Objectives:** Anxiety and depression are relevant comorbidities in asthma, but, in  
97 Portugal and Spain, data on this topic are scarce. We assessed, in patients with asthma, the  
98 frequency of anxiety and depression using the Hospital Anxiety and Depression Scale (HADS)  
99 and the European Quality of Life Five Dimension Questionnaire (EQ-5D); the level of  
100 agreement between these questionnaires, and the factors associated with these symptoms.

101 **Methods:** This is a secondary analysis of the INSPIRERS studies. A total of 614  
102 adolescents and adults with persistent asthma ( $32.6 \pm 16.9$ y, 64.7% female) were recruited  
103 from 30 primary care centres and 32 allergy, pulmonology and pediatric clinics. Demographic  
104 and clinical characteristics, HADS and EQ-5D were collected. A score  $\geq 8$  on HADS-A/HADS-D  
105 or a positive answer to EQ-5D item 5 indicated the presence of these symptoms. Agreement  
106 was determined by Cohen's kappa. Two multivariable logistic regressions were built.

107 **Results:** According to HADS, 36% of the participants had symptoms of anxiety and 12%  
108 of depression. According to EQ-5D, 36% of the participants had anxiety/depression. The  
109 agreement between questionnaires in identifying anxiety/depression was moderate ( $k=0.55$ ,  
110 95%CI 0.48-0.62). Late asthma diagnosis, comorbidities and female gender were predictors  
111 of anxiety/depression, while better asthma control, health-related quality of life and  
112 perception of health were associated with lower odds for anxiety/depression.

113 **Conclusion:** At least 1/3 of the patients with persistent asthma experience symptoms  
114 of anxiety/depression, showing the relevance of screening these disorders in patients with  
115 asthma. EQ-5D and HADS questionnaires showed a moderate agreement in the identification  
116 of anxiety/depression symptoms. The identified associated factors need to be further  
117 investigated in long-term studies.

1  
2  
3 118 **Strengths and limitations of this study**  
4  
5

6  
7 119 This study is a secondary analysis of a multicentric study that recruited both adults and  
8  
9 120 adolescents with asthma from primary and secondary care.  
10

11  
12 121 A comprehensive set of individual-level characteristics was analysed, which allowed us to  
13  
14 122 explore the impact of sociodemographic factors and cofactors such as quality of life and  
15  
16 123 asthma control on the presence of anxiety/depression symptoms.  
17

18  
19  
20 124 A possible source of bias was the recruitment strategy based on convenience sampling.  
21

22  
23 125 The frequency of distressing symptoms and the relationships with associated factors could  
24  
25 126 not be established overtime.  
26

27  
28  
29 127 **Word count:** 3661  
30

31 128  
32  
33  
34

35 129 **Key Words:** Asthma; Anxiety Disorders; Depression Disorder; Surveys and Questionnaires.  
36  
37  
38  
39  
40  
41  
42  
43  
44  
45  
46  
47  
48  
49  
50  
51  
52  
53  
54  
55  
56  
57  
58  
59  
60

## 130 **Introduction**

131 Asthma affects approximately 300 million people worldwide [1]. In Portugal, asthma  
132 affects 695 000 Portuguese, with a general prevalence of 6.8% [2]. In Spain, asthma affects  
133 more than three million people, with an estimated prevalence of 5% in adults [3]. Asthma is  
134 primarily related to chronic inflammation of the lower respiratory tract, variable airflow  
135 obstruction, and bronchial hyperresponsiveness [4]. Yet, this disease is often accompanied by  
136 multiple associated comorbidities, such as chronic rhinosinusitis, nasal polyposis, allergic  
137 rhinitis, gastroesophageal reflux disease, obstructive sleep apnea syndrome [5], and also  
138 anxiety and depression [6].

139 In two systematic reviews, the average of the reported prevalence of any anxiety  
140 disorder among patients with asthma was 24% [7] and 34% [8]. Regarding depression, a  
141 pragmatic literature review found that 1% to 45% of patients with asthma suffer from  
142 depression or depressive symptoms [9]. In severe asthma, a study reported an average  
143 prevalence of 27% for emotional distress (mainly due to anxiety and depression) [10].  
144 Currently, most studies about emotional distress focus essentially on adult patients with more  
145 severe asthma [11]. There is a lack of data regarding other asthma sub-groups, namely  
146 adolescents and those with mild or moderate persistent asthma.

147 Anxiety and depression are associated with significantly lower quality of life, poor  
148 asthma control, higher frequency of exacerbations and increased use of healthcare resources  
149 [12]. Moreover, anxiety is associated with greater perceived dyspnea intensity and may shape  
150 the quality and intensity of this symptom at a given respiratory load [13]. However, it is still  
151 uncertain whether other factors can affect the patient's psychological state. It is important to  
152 have a more sophisticated understanding of the interplay between emotional distress and  
153 asthma [14].

1  
2  
3 154           Despite these negative impacts, anxiety and depression in patients with asthma is not  
4  
5  
6 155   routinely assessed during clinical visits and thus there is a lack of information about its real-  
7  
8 156   world frequency. One of the most used tools for psychological screening is the Hospital  
9  
10 157   Anxiety and Depression Scale (HADS). HADS is a self-report questionnaire designed to screen  
11  
12  
13 158   anxiety and depression symptoms [15] and it was already used in adolescents and adults with  
14  
15 159   asthma in previous studies [16, 17]. However, this scale has 14 items and although it takes  
16  
17  
18 160   around 5 minutes to complete [18], it is not always feasible to administer in a busy clinic  
19  
20 161   setting [19, 20]. European Quality of Life Five Dimension Questionnaire (EQ-5D) is a generic  
21  
22  
23 162   measure of health status that provides a simple descriptive profile and a single index value  
24  
25 163   that can be used for the clinical and economic evaluation of healthcare [21], but also  
26  
27  
28 164   emotional distress screening [22]. Currently, EQ-5D is being widely used in a variety of  
29  
30 165   conditions, where asthma is integrated [23]. Some studies compared HADS and EQ-5D in  
31  
32  
33 166   patients with other diseases and showed that EQ-5D can be responsive to different degrees  
34  
35 167   of HADS-assessed distress [24]. Yet, there is no published data comparing HADS and EQ-5D in  
36  
37  
38 168   patients with asthma.

39  
40 169           With the present study, we aimed to assess i) the frequency of symptoms of anxiety  
41  
42 170   and depression in patients with asthma as assessed by HADS and EQ-5D questionnaires; ii)  
43  
44  
45 171   the level of agreement between the two questionnaires and iii) the factors associated with  
46  
47  
48 172   the presence of these symptoms

## 49 173   **Methods**

### 50 174   **Patient and public involvement**

51  
52  
53  
54  
55 175           No patient involved  
56  
57  
58 176

## 177 **Study design**

178 Data from the baseline face-to-face visit from 5 prospective observational studies of  
179 the INSPIRERS project were analysed [25]. This project addresses the topic of adherence to  
180 asthma inhalers among adolescents and adults with persistent asthma. Convenience samples  
181 were recruited between November 2017 and October 2020 at 32 allergy, pulmonology and  
182 paediatric secondary care outpatient clinics (30 from Portugal and 2 from Spain) and 30  
183 primary care centres from Portugal. The studies were approved by the ethics committees of  
184 all participating centres. Eligible patients were approached by physicians during medical visits.  
185 Adult patients signed a consent form. Adolescents signed an assent form, and a parental  
186 consent form was also obtained. The studies had similar inclusion criteria and methods. The  
187 study is reported according to Strengthening the Reporting of Observational Studies in  
188 Epidemiology (STROBE) guidelines [26].

## 189 **Patients**

190 Patients were included in the analysis if they had a previous medical diagnosis of  
191 persistent asthma, were at least 13 years old (13–17 years adolescents;  $\geq 18$  years adults) and  
192 had an active prescription for an inhaled controller medication for asthma. All inhaled  
193 controller treatments were allowed, and there was no change in any prescribed medication  
194 regarding the participation in these studies. Patients were excluded if they had a diagnosis of  
195 a chronic lung disease other than asthma or a diagnosis of another significant chronic  
196 condition with possible interference with the study aims.

## 197 **Data collection**

198 During the baseline face-to-face visit, data were collected from both physicians and  
199 patients in an attempt to improve the quality of the information obtained. Physicians

1  
2  
3 200 answered a questionnaire including the asthma treatment plan and comorbidities.  
4  
5  
6 201 Information about the healthcare setting (primary, secondary) was obtained based on the  
7  
8 202 centre where patients were recruited.  
9

10 203 Demographic data (age, gender, educational level, marital status and current  
11  
12  
13 204 occupation) and clinical data (weight, height, smoking habits, and age of asthma diagnosis)  
14  
15 205 were collected from patients.  
16

17  
18 206 Two asthma control questionnaires were used to gather the perspectives of the  
19  
20 207 physician and the patient. Physicians answered the Global Initiative for Asthma (GINA)  
21  
22 208 assessment of symptom control [26], which is recommended to be use at every opportunity  
23  
24  
25 209 in adolescents and adults. Patients answered the Control of Allergic Rhinitis and Asthma Test  
26  
27 210 (CARAT). CARAT is a self-report questionnaire with a total score (CARAT-T) calculated by  
28  
29 211 summing up the score of each of the 10 questions, resulting in a range of 0–30 points. A score  
30  
31 212 >24 indicates good disease control [27]. This questionnaire has been widely used in clinical  
32  
33  
34 213 practice and in scientific research, being translated/culturally adapted in >27 languages and  
35  
36 214 used in >15 different countries [28].  
37  
38  
39

40 215 The Portuguese version of the Hospital Anxiety and Depression Scale (HADS) was used  
41  
42 216 to assess the presence of symptoms of anxiety and depression [29]. HADS contains 14 items  
43  
44 217 related to the past week, 7 of which assess anxiety symptoms (HADS-A) and the other 7  
45  
46 218 depression symptoms (HADS-D). HADS-A and HADS-D are scored separately. The item  
47  
48 219 response scale varies between 0 and 3 points, with total scores ranging from 0 (minimum  
49  
50 220 symptomatic load) up to 21 (maximum symptomatic load) for HADS-A and HADS-D. A score  
51  
52 221  $\geq 8$  on HADS-A or HADS-D was considered as the presence of symptoms of anxiety or  
53  
54  
55 222 depression, respectively [30].  
56  
57  
58  
59  
60

1  
2  
3 223 The European Quality of Life Five Dimension Questionnaire (EQ-5D) three-level  
4  
5  
6 224 version was filled in by the patients to assess their overall quality of life. The item 5 “Anxiety  
7  
8 225 and Depression” could be a useful tool in screening for anxiety and depressive symptoms in  
9  
10  
11 226 hospital and community settings [31]. Therefore, this item, with its 3 response options (“I am  
12  
13 227 not anxious or depressed”, “I am moderately anxious or depressed”, “I am extremely anxious  
14  
15 228 or depressed”) was additionally used to assess the presence of these symptoms [32]. Patients  
16  
17  
18 229 were considered to have anxiety/depression when answering “I am moderately anxious or  
19  
20  
21 230 depressed” or “I am extremely anxious or depressed”. The EQ-5D summary index score was  
22  
23 231 calculated to characterize the sample. It ranges from less than 0 (where 0 is a health state  
24  
25 232 equivalent to death) to 1 (perfect health) [33]. The EQ-5D VAS was also used to assess  
26  
27  
28 233 patients’ perception of their general health (from 0 ‘the worst health you can imagine’ to 100  
29  
30 234 ‘the best health you can imagine’).

### 32 33 235 **Statistical Analyses**

34  
35 236 Descriptive statistics were used to characterize the sociodemographic variables,  
36  
37  
38 237 clinical characteristics, the HADS score and EQ-5D responses. Absolute and relative  
39  
40 238 frequencies were used to characterize the categorical variables. Means and standard  
41  
42  
43 239 deviations or medians and interquartile ranges were used, according to data distribution, to  
44  
45 240 characterize the numerical variables.

46  
47  
48 241 To determine the agreement between HADS and EQ-5D questionnaires for the  
49  
50 242 presence of symptoms of anxiety/depression, the percentage of agreement and weighted  
51  
52  
53 243 Cohen’s kappa were used. Cohen’s kappa values were interpreted as follows: <0, no  
54  
55 244 agreement; 0–0.20, slight; 0.21–0.40, fair; 0.41–0.60, moderate; 0.61–0.80, substantial and  
56  
57 245 0.81–1.0, almost perfect agreement [34].  
58  
59  
60



1  
2  
3 246 To explore associations between variables related to the presence of symptoms of  
4  
5  
6 247 anxiety and depression, patients with and without symptoms of anxiety and depression were  
7  
8 248 compared using independent t-tests for normally distributed data, Mann-Whitney U tests for  
9  
10 249 non-normally distributed continuous data and ordinal data, and Chi-square tests for  
11  
12  
13 250 categorical data. In the case of Chi-square tests, when a statistically significant difference was  
14  
15 251 found for a categorical variable with more than two categories, chi-square multiple  
16  
17 252 comparison tests with Bonferroni correction were performed to explore which categories  
18  
19  
20 253 differed from each other. The variables that were statistically different ( $p < 0.05$ ) between the  
21  
22  
23 254 two groups were selected to further explore their relationship with the presence of anxiety  
24  
25 255 and depression and to adjust for possible confounders in two stepwise multivariable logistic  
26  
27 256 regression models. The dependent variable in each multivariable logistic regression was the  
28  
29  
30 257 presence of symptoms of anxiety or depression based on HADS (0 = absent, 1 = present). The  
31  
32  
33 258 overall models were evaluated using the goodness-of-fit tests and Nagelkerke's R-square and  
34  
35 259 the final model was selected based on the best combination of these results. The level of  
36  
37 260 significance considered was 0.05. Statistical analyses were performed using IBM SPSS  
38  
39  
40 261 Statistics version 26.0 (IBM Corporation, Armonk, NY, USA).

## 41 42 262 **Results**

### 43 44 45 263 **Patient's Characteristics**

46  
47  
48 264 A total of 614 participants with asthma (mean age  $32.6 \pm 16.9$  years) were included in  
49  
50  
51 265 this study. There were 447 (72.8%) adults and 397 (64.7%) females. Forty percent of the  
52  
53 266 participants had completed primary school ( $n=244$ ), 47.4% were employed ( $n=289$ ) and 65.1%  
54  
55  
56 267 were prescribed only 1 inhaler ( $n=396$ ). According to the GINA assessment of symptom  
57  
58  
59  
60

268 control, 296 (48.7%) patients had well controlled asthma. Table 1 shows the socio-  
 269 demographic and clinical characteristics of the study participants.

270 TABLE 1. Socio-demographic and clinical characteristics of the participants (n=614).

| <b>Characteristics</b>                                    |             |
|-----------------------------------------------------------|-------------|
| <b>Age (years) M ± SD<sup>a</sup></b>                     | 32.6 ± 16.9 |
| <b>Age group n (%)</b>                                    |             |
| Adolescent                                                | 167 (27.2)  |
| Adult                                                     | 447 (72.8)  |
| <b>Gender n (%)</b>                                       |             |
| Female                                                    | 397 (64.7)  |
| Male                                                      | 217 (35.3)  |
| <b>Educational level n (%)<sup>b</sup></b>                |             |
| No education completed                                    | 4 (0.7)     |
| Primary school                                            | 244 (40.4)  |
| High school                                               | 177 (29.3)  |
| Qualification above high school (but not university)      | 23 (3.8)    |
| University                                                | 156 (25.4)  |
| Other                                                     | 1 (0.2)     |
| <b>Marital status n (%)<sup>c</sup></b>                   |             |
| Single                                                    | 348 (56.7)  |
| Married/Living as a couple                                | 223 (36.3)  |
| Separated/divorced                                        | 33 (5.4)    |
| Widowed                                                   | 9 (1.5)     |
| <b>Current occupation n (%)<sup>d</sup></b>               |             |
| Employed                                                  | 289 (47.1)  |
| Student                                                   | 235 (38.3)  |
| Unemployed                                                | 41 (6.7)    |
| Retired                                                   | 36 (5.9)    |
| Other                                                     | 9 (1.5)     |
| <b>BMI Kg/m<sup>2</sup>, M ± SD<sup>e</sup></b>           | 24.7 (5.3)  |
| <b>Smoking Status n (%)<sup>d</sup></b>                   |             |
| Never smoker                                              | 457 (74.4)  |
| Ex-smoker                                                 | 106 (17.3)  |
| Current smoker                                            | 47 (7.7)    |
| <b>Setting</b>                                            |             |
| Secondary care                                            | 475 (77.4)  |
| Primary care                                              | 139 (22.6)  |
| <b>Age of asthma diagnosis (years) M ± SD<sup>f</sup></b> | 16.2 ± 14.8 |
| <b>Number of prescribed inhalers n (%)<sup>g</sup></b>    |             |

|    |                                                                    |                  |
|----|--------------------------------------------------------------------|------------------|
| 1  | 1                                                                  | 396 (64.5)       |
| 2  | 2                                                                  | 193 (31.4)       |
| 3  | ≥3                                                                 | 19 (3.1)         |
| 4  | <b>GINA assessment symptom control n (%)<sup>g</sup></b>           |                  |
| 5  | Well controlled                                                    | 296 (48.2)       |
| 6  | Partly controlled                                                  | 188 (30.6)       |
| 7  | Uncontrolled                                                       | 124 (20.2)       |
| 8  | <b>Number of physician-reported comorbidities Median (P25-P75)</b> |                  |
| 9  | <b>CARAT-T Median (P25-P75)</b>                                    |                  |
| 10 | 1 [0-2]                                                            |                  |
| 11 | <b>CARAT-T Classification</b>                                      |                  |
| 12 | Controlled n (%)                                                   | 156 (25.4)       |
| 13 | Uncontrolled n (%)                                                 | 458 (74.6)       |
| 14 | <b>EQ-5D-3L Median (P25-P75)</b>                                   |                  |
| 15 | Total                                                              | 0.91 [0.81-1.0]  |
| 16 | VAS                                                                | 80.0 [70.0-90.0] |

M = Mean; SD= Standard Deviation; BMI=body mass index; GINA = Global Initiative for Asthma; P25= 25<sup>th</sup> percentile; P75= 75<sup>th</sup> percentile; CARAT-T=Control of Allergic Rhinitis and Asthma Test total score; EQ-5D-3L= European Quality of Life Five Dimension Questionnaire-three-level version; VAS= Visual analogue scale.

<sup>a</sup> 8 missing values. <sup>b</sup> 9 missing values. <sup>c</sup> missing value. <sup>d</sup> 4 missing values. <sup>e</sup> 28 missing values. <sup>f</sup> 22 missing values. <sup>g</sup> 6 missing values.

## 275 Symptoms of anxiety and depression

276 According to HADS, 221 (36.0%) participants had symptoms of anxiety, 73 (11.9%) had  
 277 symptoms of depression, 59 (9.6%) both symptoms and 235 (38.3%) participants had  
 278 symptoms of anxiety or depression. Both anxiety (41.4% vs 21.6%) and depression (14.1% vs  
 279 6%) symptoms were more frequent in adults than adolescents. According to EQ-5D, 223  
 280 (36.3%) participants had anxiety or depression problems, 32.6% were moderately anxious or  
 281 depressed and 3.7% extremely anxious or depressed. The agreement between these two  
 282 questionnaires was moderate for anxiety (k=0.54 (95%CI 0.47-0.61)); fair for depression  
 283 (k=0.23 (95%CI 0.17-0.30)) and moderate for anxiety/depression (k=0.55 (95% CI 0.48-0.62)).

## 284 Predictors of anxiety and depression

285 In the multivariable logistic regression (Table 2), being an adolescent (OR 0.43, 95% CI  
 286 0.27-0.68), having a better asthma control (CARAT-T score) (OR 0.98, 95% CI 0.94-1.00) and a  
 287 perception of better health (OR 0.97, 95% CI 0.95-0.98) were significantly associated with

288 lower odds for the presence of anxiety symptoms. In contrast, being a female was significantly  
 289 associated with a higher odd for the presence of anxiety symptoms (OR 1.75, 95% CI 1.56-  
 290 2.64). Having better health-related quality of life (OR 0.97, 95%CI 0.95-0.99) and perception  
 291 of better health (OR 0.97, 95% CI 0.96-0.99) were associated with a lower odd for the  
 292 presence of depression. While asthma diagnosis at a later age (OR 1.03, 95% CI 1.01-1.05) and  
 293 the presence of a higher number of comorbidities (OR 1.31, 95% CI 1.05-1.64) were associated  
 294 with an increase in the likelihood of exhibiting symptoms of depression. The univariate  
 295 analyses are presented in Supplementary Table 1.

296 Table 2 – Multivariable logistic regression analyses to explain anxiety and depression.

|                                                   | Anxiety<br>adjusted OR (95% CI)* | Depression<br>adjusted OR (95% CI)** |
|---------------------------------------------------|----------------------------------|--------------------------------------|
| <b>Age group</b>                                  |                                  |                                      |
| Adolescent                                        | 0.43 (0.27-0.68)                 | -                                    |
| Adult                                             | Reference                        | -                                    |
| <b>Gender</b>                                     |                                  |                                      |
| Female                                            | 1.75 (1.56-2.64)                 | -                                    |
| Male                                              | Reference                        | -                                    |
| <b>Age of asthma diagnosis</b>                    | -                                | 1.03 (1.01-1.05)                     |
| <b>Number of physician-reported comorbidities</b> | 1.17 (0.99-1.37)                 | 1.31 (1.05-1.64)                     |
| <b>CARAT T</b>                                    | 0.98 (0.94-1.00)                 | -                                    |
| <b>Quality of life (EQ-5D total)</b>              | -                                | 0.97 (0.95-0.99)                     |
| <b>Perception of better health (EQ-5D VAS)</b>    | 0.97 (0.95-0.98)                 | 0.97 (0.96-0.99)                     |
| <b>R<sup>2</sup></b>                              | 22%                              | 23%                                  |
| <b>Hosmer-Lemeshow test - p-value</b>             | .435                             | .449                                 |

297 OR = Odds ratio; CI = Confidence interval; BMI = body mass index; CARAT-T = Control of Allergic Rhinitis and Asthma Test total score; EQ-5D  
 298 = European Quality of Life Five Dimension Questionnaire; VAS= Visual analogue scale.

299 \*Age, current occupation, setting, age of asthma diagnosis, GINA assessment of symptom control and quality of life (EQ-5D total) were also  
 300 tested but not included in the final adjusted model.

301 \*\*Age, age group, educational level, marital status, current occupation, BMI, GINA assessment of symptom control and CARAT T were also  
 302 tested but not included in the final adjusted model.

303

## 304 **Discussion**

305 This study showed that more than 1/3 of participants with asthma experienced  
306 symptoms of anxiety and/or depression. Asthma diagnosis at a later age, presence of  
307 comorbidities and female gender were predictors of anxiety/depression, while better asthma  
308 control, health-related quality of life and perception of better health were factors associated  
309 with lower odds for anxiety/depression. In this study, the agreement between HADS and EQ-  
310 5D questionnaires in identifying anxiety and depression was sufficient to moderate.

311 According to HADS and EQ-5D questionnaires, more than 1/3 of the patients with  
312 persistent asthma experience symptoms of anxiety/depression (38.3% and 36.3%  
313 respectively). Therefore, the percentages of participants with one of these symptoms  
314 detected by HADS and EQ-5D were similar. With HADS, it was possible to detect the  
315 percentages of patients with persistent asthma that had only symptoms of anxiety (36.0%) or  
316 had only symptoms of depression (11.9%). The proportions found in the present study were  
317 similar to the ones found among patients with asthma in previous reviews [8, 9], analysing  
318 studies that included only, or mostly, adults with asthma. A study from the UK found similar  
319 frequencies of anxiety and depression using HADS, although a slightly higher cut-off has been  
320 used (HADS-A/HADS-D $\geq$ 10) [35]. We found a lower frequency for depression as compared  
321 with a study in patients with severe asthma, where 25% reported depression [36]. This  
322 difference might be explained by the role of poorer physical functioning on symptoms of  
323 depression [37]. Patients with severe asthma experience more physical disability. Other  
324 studies reported that patients with severe asthma have more often emotional distress as  
325 compared to patients with mild-moderate asthma [38, 39].

1  
2  
3 326 This study includes both adolescents and adults with persistent asthma, which is rarely  
4  
5  
6 327 found in previous articles. However, anxiety and depression were only assessed at one time  
7  
8 328 point. Analysing emotional distress in the long run could be important as suggested in  
9  
10 329 previous cohort studies that followed adolescents with asthma to young adulthood, showing  
11  
12  
13 330 that there was a persistence or recurrence of anxiety and depression in adulthood [40, 41]. In  
14  
15 331 our study, adults with persistent asthma presented an increased frequency of  
16  
17 332 anxiety/depression symptoms (vs adolescents), which is in accordance with a population-  
18  
19  
20 333 based study that reported that having asthma and older age were independent risk factors  
21  
22  
23 334 for the presence of anxiety disorders, in participants above the age of 15 years [42].  
24  
25 335 Therefore, emotional distress seems to be associated with age differences in patients with  
26  
27  
28 336 persistent asthma.

29  
30 337 Age at asthma onset has emerged as a critical factor in distinguishing the phenotypes  
31  
32 338 of asthma [43]. Adult-onset asthma differs from asthma that first occurs in childhood since it  
33  
34  
35 339 usually is less well controlled, is associated with a faster decline in lung function and with  
36  
37  
38 340 more comorbidities [44, 45]. Moreover, worse asthma control and the presence of more  
39  
40  
41 341 comorbidities might be associated with an increased risk of emotional distress [46]. These  
42  
43 342 results contribute to explaining our finding that asthma diagnosis at a later age and number  
44  
45 343 of physician-reported comorbidities were associated with a higher frequency of depression.  
46  
47  
48 344 Female patients were more likely to have anxiety symptoms. This was previously observed in  
49  
50 345 other studies in asthma but also other respiratory diseases, such as COPD. Possibly these  
51  
52  
53 346 gender differences are more than a specificity of respiratory diseases, but a reflection of the  
54  
55 347 known gender differences in the general population [47, 48].  
56  
57  
58  
59  
60

1  
2  
3 348 In our study, the perception of better health was associated with a lower odd for the  
4  
5  
6 349 presence of anxiety symptoms. In a previous study with patients with chronic obstructive  
7  
8 350 pulmonary disease (COPD), the perceived severity of COPD symptoms was predictive of  
9  
10 351 depression and anxiety [49]. These findings are in line with our study, although coming from  
11  
12  
13 352 a different disease. The close correlation between asthma control, quality of life, anxiety, and  
14  
15 353 depression has been also confirmed in other studies [50, 51]. Consequently, in patients with  
16  
17 354 poor asthma control, physicians should ask about the symptoms of anxiety/depression or  
18  
19 355 screen it using simple tools like EQ-5D or HADS before making adjustments on asthma  
20  
21  
22 356 treatment strategy [17].  
23  
24  
25

26 357 EQ-5D questionnaire could be useful in clinical practice [52]. The EQ-5D anxiety or  
27  
28 358 depression domain had a greater agreement with the HADS score in identifying cases with  
29  
30 359 both symptoms, as expected, than in identifying anxiety or depressive symptoms. In general,  
31  
32 360 the percentages of patients with anxiety/depression detected by HADS and EQ-5D were  
33  
34 361 similar. Furthermore, it is expected that remarkably less time consumption is needed for the  
35  
36 362 EQ-5D item 5 assessment compared with HADS [18, 53]. Therefore, EQ-5D score appears to  
37  
38 363 have value as a screening tool for anxiety or depression in patients with asthma. In a previous  
39  
40 364 study, this questionnaire also seemed to be reasonably valid and moderately responsive in  
41  
42 365 patients with anxiety disorders [54]. This could be important in clinical practice because a  
43  
44 366 generic health instrument like the EQ-5D, with few and quick questions, could be used to  
45  
46 367 easily raise awareness of a possible emotional distress in patients with asthma. A limitation  
47  
48 368 of EQ-5D is that anxiety and depression are two separate emotional disorders and their  
49  
50 369 combination in a single item in this questionnaire could lead to inconsistencies in responses  
51  
52 370 [55]. Nevertheless, EQ-5D could be used as a first screening questionnaire and, in patients  
53  
54 371 reporting anxiety or depression symptoms, a more specific questionnaire, such as HADS,  
55  
56  
57  
58  
59  
60

1  
2  
3 372 could be used to better characterize their symptoms. Actually, emotional distress screening  
4  
5  
6 373 is very important in clinical practice because physicians can use targeted interventions to  
7  
8 374 improve patients' symptoms [56]. Studies about psychological interventions in adults with  
9  
10 375 asthma suggest that education and simple psychological interventions namely relaxation  
11  
12  
13 376 techniques and biofeedback or a stepped care approach could produce significant positive  
14  
15 377 healthcare outcomes [57, 58].  
16  
17

18 378 This study has some strengths that should be acknowledged: it is a multicentric study  
19  
20  
21 379 that recruited both adults and adolescents with asthma from primary and secondary care. A  
22  
23 380 comprehensive set of individual-level characteristics was collected and analysed, which  
24  
25  
26 381 allowed us to explore the impact of a range of sociodemographic factors, health literacy and  
27  
28 382 cofactors such as quality of life and asthma control. Therefore, includes a sample from  
29  
30 383 different health care contexts and with different clinical presentations, contributing to the  
31  
32  
33 384 robustness of these findings.  
34  
35

36 385 Nevertheless, it also has some limitations. A possible source of bias was the  
37  
38 386 recruitment strategy of using a convenience sampling. Future studies using other sampling  
39  
40  
41 387 strategies could be important to generalise the results of our study. A control group of healthy  
42  
43 388 individuals with similar socio-demographic characteristics should also be included in further  
44  
45  
46 389 research to increase the validity of these findings. In the absence of a control group it would  
47  
48 390 have been useful to compare anxiety/depression frequencies with normative data from  
49  
50  
51 391 Portugal and Spain, but we did not find it neither for HADS nor EQ-5D. Moreover, the impact  
52  
53 392 of the presence of specific comorbidities, such as rhinitis, which is closely associated both  
54  
55  
56 393 with asthma and anxiety/depression, was not assessed [59]. Another limitation of the present  
57  
58 394 study is related to its cross-sectional nature. The frequency of distressing symptoms and the  
59  
60



1  
2  
3 395 relationships with associated factors could not be established along the progression of the  
4  
5  
6 396 disease. Also, patients were not recruited at the same time point, as recruitment in the  
7  
8 397 Inspirers studies occurred across 4 different years (from 2017 to 2020), and the last 15% of  
9  
10 398 the sample was recruited during COVID-19 pandemic. Longitudinal studies following a cohort  
11  
12  
13 399 of patients with asthma would address these issues and identify other predictors of symptoms  
14  
15 400 of anxiety and depression.

17  
18 401 This study shows that more than 30% of the patients with persistent asthma  
19  
20 402 experience symptoms of anxiety/depression, which supports the relevance of emotional  
21  
22 403 distress screening in patients with asthma. EQ-5D and HADS questionnaires showed a  
23  
24 404 moderate agreement in the identification of anxiety/depression symptoms. Late asthma  
25  
26 405 diagnosis, presence of comorbidities and female gender were positively associated with the  
27  
28 406 presence of emotional distress, while better asthma control, health-related quality of life and  
29  
30 407 perception of better health presented a negative association. These factors need to be further  
31  
32 408 investigated in future long-term studies.

### 38 39 409 **a. Contributorship statement**

40  
41  
42 410 All authors contributed to the selection of bibliography, revision and final approval of the  
43  
44 411 manuscript. AMP, RA, MAC, RAlmeida, JAF and CJ were responsible for study conception and  
45  
46 412 design; RA, AMP, RAlmeida, MAC, CCL, CL, JC, CR, CV, DAA, DP, MFM, MJV, CLozoya, NS, FC,  
47  
48 413 LTB, RF, PMS, TMF, RC, ES, DB, CG, MJC, SS, MLM, AM, CN, CVieira, RP, AA, JVM, BR, LM, RM,  
49  
50 414 MC, BV, DSC, SF, PM, MAA, ARM, JAF and CJ participated in the data collection; CJ and AMP  
51  
52 415 performed the data analysis and MSC prepared the first draft. All authors contributed to the  
53  
54 416 interpretation of data, to the critical revision of the manuscript for important intellectual  
55  
56 417 content.

1  
2  
3  
4 418 **b. Competing interests**

5  
6  
7 419 None

8  
9  
10 420 **c. Funding**

11  
12  
13  
14 421 This study is a secondary analysis from the mINSPIRE project financed by national funds  
15  
16 422 through the Foundation for Science and Technology (PTDC/MEC-OUT/29130/2017) and co-  
17  
18 423 financed by Operational Programme “Competitiveness and Internationalization” (COMPETE  
19  
20 424 2020), PORTUGAL 2020 from European Regional Development Fund - FEDER (POCI-01-0145-  
21  
22 425 FEDER-029130).

23  
24  
25  
26  
27 426 **d. Data sharing statement**

28  
29  
30  
31 427 The data sets generated during and/or analysed during the current study are not publicly available.

32  
33  
34 428 **Ethics approval**

35  
36  
37 429 The studies were approved by the ethics committees of all participating centres. For example, the  
38  
39 430 study was approved by the Ethics Committee of Centro Hospitalar de S. João—EPE (protocol code 258-  
40  
41 431 17 and date of approval: 5th of January 2018).

42  
43  
44  
45 432 **References**

- 46  
47  
48  
49 433 1. Nanda, A. and A.N. Wasan, *Asthma in Adults*. Med Clin North Am, 2020. **104**(1): p. 95-108.  
50 434 2. Sa-Sousa, A., et al., *Prevalence of asthma in Portugal - The Portuguese National Asthma*  
51 435 *Survey*. Clin Transl Allergy, 2012. **2**(1): p. 15.  
52 436 3. Cisneros, C., et al., *Accreditation of specialized asthma units for adults in Spain: an applicable*  
53 437 *experience for the management of difficult-to-control asthma*. J Asthma Allergy, 2017. **10**: p.  
54 438 163-169.  
55 439 4. Mims, J.W., *Asthma: definitions and pathophysiology*. Int Forum Allergy Rhinol, 2015. **5**  
56 440 **Suppl 1**: p. S2-6.  
57 441 5. Porsbjerg, C. and A. Menzies-Gow, *Co-morbidities in severe asthma: Clinical impact and*  
58 442 *management*. Respirology, 2017. **22**(4): p. 651-661.

- 1  
2  
3 443 6. Homętowska, H., et al., *Fatigue, Depression, and Anxiety in Patients with COPD, Asthma and*  
4 444 *Asthma-COPD Overlap*. J Clin Med, 2022. **11**(24).
- 5 445 7. Ye, G., D.S. Baldwin, and R. Hou, *Anxiety in asthma: a systematic review and meta-analysis*.  
6 446 Psychological Medicine, 2021. **51**(1): p. 11-20.
- 7 447 8. Weiser, E.B., *The Prevalence of Anxiety Disorders Among Adults with Asthma: A Meta-*  
8 448 *Analytic Review*. Journal of Clinical Psychology in Medical Settings, 2007. **14**(4): p. 297-307.
- 9 449 9. Opolski, M. and I. Wilson, *Asthma and depression: a pragmatic review of the literature and*  
10 450 *recommendations for future research*. Clin Pract Epidemiol Ment Health, 2005. **1**: p. 18.
- 11 451 10. Clark, V.L., et al., *Multidimensional assessment of severe asthma: A systematic review and*  
12 452 *meta-analysis*. Respirology, 2017. **22**(7): p. 1262-1275.
- 13 453 11. Lomper, K., et al., *Effects of depression and anxiety on asthma-related quality of life*.  
14 454 Pneumonol Alergol Pol, 2016. **84**(4): p. 212-21.
- 15 455 12. Sastre, J., et al., *Anxiety, Depression, and Asthma Control: Changes After Standardized*  
16 456 *Treatment*. J Allergy Clin Immunol Pract, 2018. **6**(6): p. 1953-1959.
- 17 457 13. Li, H.L., et al., *Anxiety but not depression symptoms are associated with greater perceived*  
18 458 *dyspnea in asthma during bronchoconstriction*. Allergy Asthma Proc, 2015. **36**(6): p. 447-57.
- 19 459 14. McCauley, E., et al., *Impact of anxiety and depression on functional impairment in*  
20 460 *adolescents with asthma*. Gen Hosp Psychiatry, 2007. **29**(3): p. 214-22.
- 21 461 15. Annunziata, M.A., et al., *Hospital Anxiety and Depression Scale (HADS) accuracy in cancer*  
22 462 *patients*. Support Care Cancer, 2020. **28**(8): p. 3921-3926.
- 23 463 16. Licari, A., et al., *Anxiety and depression in adolescents with asthma: a study in clinical*  
24 464 *practice*. Acta Biomed, 2022. **93**(1): p. e2022021.
- 25 465 17. Labor, M., et al., *Long-term predictors of anxiety and depression in adult patients with*  
26 466 *asthma*. Wien Klin Wochenschr, 2017. **129**(19-20): p. 665-673.
- 27 467 18. Snaith, R.P., *The Hospital Anxiety And Depression Scale*. Health Qual Life Outcomes, 2003. **1**:  
28 468 p. 29.
- 29 469 19. Mitchell, A.J., *Screening for cancer-related distress: when is implementation successful and*  
30 470 *when is it unsuccessful?* Acta Oncol, 2013. **52**(2): p. 216-24.
- 31 471 20. Turon, H., et al., *Agreement between a single-item measure of anxiety and depression and*  
32 472 *the Hospital Anxiety and Depression Scale: A cross-sectional study*. PLoS One, 2019. **14**(1): p.  
33 473 e0210111.
- 34 474 21. Rabin, R. and F. de Charro, *EQ-5D: a measure of health status from the EuroQol Group*. Ann  
35 475 Med, 2001. **33**(5): p. 337-43.
- 36 476 22. Chotai, S., et al., *Utility of Anxiety/Depression Domain of EQ-5D to Define Psychological*  
37 477 *Distress in Spine Surgery*. World Neurosurg, 2019. **126**: p. e1075-e1080.
- 38 478 23. Afshari, S., et al., *Health related quality of life in adults with asthma: a systematic review to*  
39 479 *identify the values of EQ-5D-5L instrument*. Journal of Asthma, 2021: p. 1-10.
- 40 480 24. Whynes, D.K., *Responsiveness of the EQ-5D to HADS-identified anxiety and depression*. J Eval  
41 481 Clin Pract, 2009. **15**(5): p. 820-5.
- 42 482 25. Jácome, C., et al., *MINSPIRERS – Feasibility of a mobile application to measure and improve*  
43 483 *adherence to inhaled controller medications among adolescents and adults with persistent*  
44 484 *asthma: Protocol for a multicentre observational study*. Revista Portuguesa de  
45 485 Imunoalergologia, 2018. **26**: p. 47-61.
- 46 486 26. Vandembroucke, J.P., et al., *Strengthening the Reporting of Observational Studies in*  
47 487 *Epidemiology (STROBE): explanation and elaboration*. Int J Surg, 2014. **12**(12): p. 1500-24.
- 48 488 27. Fonseca, J.A., et al., *Validation of a questionnaire (CARAT10) to assess rhinitis and asthma in*  
49 489 *patients with asthma*. Allergy, 2010. **65**(8): p. 1042-8.
- 50 490 28. Vieira, R.J., et al., *Control of Allergic Rhinitis and Asthma Test: A systematic review of*  
51 491 *measurement properties and COSMIN analysis*. Clin Transl Allergy, 2022. **12**(9): p. e12194.
- 52 492 29. Pais-Ribeiro, J., et al., *Validation study of a Portuguese version of the Hospital Anxiety and*  
53 493 *Depression Scale*. Psychol Health Med, 2007. **12**(2): p. 225-35; quiz 235-7.

- 1  
2  
3 494 30. Bjelland, I., et al., *The validity of the Hospital Anxiety and Depression Scale. An updated*  
4 495 *literature review*. J Psychosom Res, 2002. **52**(2): p. 69-77.
- 5 496 31. Short, H., et al., *The performance of the EQ-5D-3L in screening for anxiety and depressive*  
6 497 *symptoms in hospital and community settings*. Health Qual Life Outcomes, 2021. **19**(1): p.  
7 498 96.
- 8 499 32. Ferreira, P.L., L.N. Ferreira, and L.N. Pereira, [*Contribution for the validation of the*  
9 500 *Portuguese version of EQ-5D*]. Acta Med Port, 2013. **26**(6): p. 664-75.
- 10 501 33. Azevedo, L., et al., *Validity and reliability of EQ5D questionnaire in critically ill patients*.  
11 502 *Critical Care Medicine*, 2007. **35**: p. 619.
- 12 503 34. Gabbe, B.J., et al., *Level of agreement between patient-reported EQ-5D responses and EQ-5D*  
13 504 *responses mapped from the SF-12 in an injury population*. Popul Health Metr, 2015. **13**: p.  
14 505 14.
- 15 506 35. Cooper, C.L., et al., *Anxiety and panic fear in adults with asthma: prevalence in primary care*.  
16 507 *BMC Fam Pract*, 2007. **8**: p. 62.
- 17 508 36. McDonald, V.M., et al., *Treatable traits can be identified in a severe asthma registry and*  
18 509 *predict future exacerbations*. Respirology, 2019. **24**(1): p. 37-47.
- 19 510 37. Folkman, S., *Stress: Appraisal and Coping*, in *Encyclopedia of Behavioral Medicine*, M.D.  
20 511 Gellman and J.R. Turner, Editors. 2013, Springer New York: New York, NY. p. 1913-1915.
- 21 512 38. Akula, M., et al., *The relationship between asthma and depression in a community-based*  
22 513 *sample*. J Asthma, 2018. **55**(12): p. 1271-1277.
- 23 514 39. Amelink, M., et al., *Anxiety, depression and personality traits in severe, prednisone-*  
24 515 *dependent asthma*. Respir Med, 2014. **108**(3): p. 438-44.
- 25 516 40. Goodwin, R.D., D.M. Fergusson, and L.J. Horwood, *Asthma and depressive and anxiety*  
26 517 *disorders among young persons in the community*. Psychol Med, 2004. **34**(8): p. 1465-74.
- 27 518 41. Ferro, M.A., et al., *Condition-specific associations of symptoms of depression and anxiety in*  
28 519 *adolescents and young adults with asthma and food allergy*. J Asthma, 2016. **53**(3): p. 282-8.
- 29 520 42. Lee, Y.C., et al., *Association of asthma and anxiety: A nationwide population-based study in*  
30 521 *Taiwan*. J Affect Disord, 2016. **189**: p. 98-105.
- 31 522 43. Ilmarinen, P., L.E. Tuomisto, and H. Kankaanranta, *Phenotypes, Risk Factors, and*  
32 523 *Mechanisms of Adult-Onset Asthma*. Mediators Inflamm, 2015. **2015**: p. 514868.
- 33 524 44. Burdon, J., *Adult-onset asthma*. Aust Fam Physician, 2015. **44**(8): p. 554-7.
- 34 525 45. Dunn, R.M., P.J. Busse, and M.E. Wechsler, *Asthma in the elderly and late-onset adult*  
35 526 *asthma*. Allergy, 2018. **73**(2): p. 284-294.
- 36 527 46. Katz, P.P., et al., *Onset of depressive symptoms among adults with asthma: results from a*  
37 528 *longitudinal observational cohort*. Prim Care Respir J, 2010. **19**(3): p. 223-30.
- 38 529 47. Altemus, M., *Sex differences in depression and anxiety disorders: potential biological*  
39 530 *determinants*. Horm Behav, 2006. **50**(4): p. 534-8.
- 40 531 48. Baxter, A.J., et al., *Global prevalence of anxiety disorders: a systematic review and meta-*  
41 532 *regression*. Psychol Med, 2013. **43**(5): p. 897-910.
- 42 533 49. Cleland, J.A., A.J. Lee, and S. Hall, *Associations of depression and anxiety with gender, age,*  
43 534 *health-related quality of life and symptoms in primary care COPD patients*. Fam Pract, 2007.  
44 535 **24**(3): p. 217-23.
- 45 536 50. Di Marco, F., et al., *Close correlation between anxiety, depression, and asthma control*.  
46 537 *Respir Med*, 2010. **104**(1): p. 22-8.
- 47 538 51. Laforest, L., et al., *Influence of patients' characteristics and disease management on asthma*  
48 539 *control*. J Allergy Clin Immunol, 2006. **117**(6): p. 1404-10.
- 49 540 52. Szentes, B.L., et al., *How does the EQ-5D-5L perform in asthma patients compared with an*  
50 541 *asthma-specific quality of life questionnaire?* BMC Pulm Med, 2020. **20**(1): p. 168.
- 51 542 53. Jin, X., et al., *The EQ-5D-5L Is Superior to the -3L Version in Measuring Health-related Quality*  
52 543 *of Life in Patients Awaiting THA or TKA*. Clin Orthop Relat Res, 2019. **477**(7): p. 1632-1644.
- 53  
54  
55  
56  
57  
58  
59  
60

- 1  
2  
3 544 54. König, H.H., et al., *Validity and responsiveness of the EQ-5D in assessing and valuing health*  
4 545 *status in patients with anxiety disorders*. Health Qual Life Outcomes, 2010. **8**: p. 47.  
5 546 55. Whalley, D., et al., *Is the EQ-5D fit for purpose in asthma? Acceptability and content validity*  
6 547 *from the patient perspective*. Health Qual Life Outcomes, 2018. **16**(1): p. 160.  
7 548 56. Cooley, C., et al., *Impact of interventions targeting anxiety and depression in adults with*  
8 549 *asthma*. J Asthma, 2022. **59**(2): p. 273-287.  
9 550 57. Yorke, J., S.L. Fleming, and C. Shuldham, *Psychological interventions for adults with asthma:*  
10 551 *a systematic review*. Respir Med, 2007. **101**(1): p. 1-14.  
11 552 58. Stoop, C.H., et al., *Effectiveness of a stepped care intervention for anxiety and depression in*  
12 553 *people with diabetes, asthma or COPD in primary care: A randomized controlled trial*. J Affect  
13 554 *Disord*, 2015. **184**: p. 269-76.  
14 555 59. Rodrigues, J., et al., *Allergic Rhinitis Seasonality, Severity, and Disease Control Influence*  
15 556 *Anxiety and Depression*. Laryngoscope, 2022.

18  
19 557  
20  
21  
22  
23  
24  
25  
26  
27  
28  
29  
30  
31  
32  
33  
34  
35  
36  
37  
38  
39  
40  
41  
42  
43  
44  
45  
46  
47  
48  
49  
50  
51  
52  
53  
54  
55  
56  
57  
58  
59  
60

## 1 Supplementary table 1 – Univariate analyses to explain anxiety and depression symptoms.

|                                                                                   | <b>Anxiety</b>           | <b>Depression</b>        |
|-----------------------------------------------------------------------------------|--------------------------|--------------------------|
|                                                                                   | <b>crude OR (95% CI)</b> | <b>crude OR (95% CI)</b> |
| <b>Age</b>                                                                        | 1.02 (1.01-1.03)         | 1.05 (1.03-1.06)         |
| <b>Age group</b>                                                                  |                          |                          |
| Adolescent                                                                        | 0.39 (0.26-0.59)         | 0.39 (0.19-0.78)         |
| Adult                                                                             | Reference                | Reference                |
| <b>Gender</b>                                                                     |                          |                          |
| Females                                                                           | 2.44 (1.68-3.53)         | 1.64 (0.95-2.85)         |
| Males                                                                             | Reference                | Reference                |
| <b>Educational level</b>                                                          |                          |                          |
| No education completed/Primary school                                             | 0.99 (0.71-1.39)         | 1.67 (1.01-2.74)         |
| High school/Qualification above high school (but not university)/University/Other | Reference                | Reference                |
| <b>Marital status</b>                                                             |                          |                          |
| Single/ Separated/Divorced/Widowed                                                | 0.72 (0.52-1.02)         | 0.45 (0.27-0.74)         |
| Married/Living as a couple                                                        | Reference                | Reference                |
| <b>Current occupation</b>                                                         |                          |                          |
| Employed/Student/Other                                                            | 0.55 (0.35-0.87)         | 0.25 (0.14-0.43)         |
| Unemployed/Retired                                                                | Reference                | Reference                |
| <b>BMI</b>                                                                        | 1.03 (0.99-1.06)         | 1.08 (1.04-1.13)         |
| <b>Smoking status</b>                                                             |                          |                          |
| Non-smokers                                                                       | 0.56 (0.31-1.02)         | 0.92 (0.37-2.24)         |
| Smokers                                                                           | Reference                | Reference                |
| <b>Setting</b>                                                                    |                          |                          |
| Primary care                                                                      | 1.60 (1.09-2.35)         | 1.04 (0.58-1.86)         |
| Secondary care                                                                    | Reference                | Reference                |
| <b>Age of asthma diagnosis</b>                                                    | 1.02 (1.01-1.03)         | 1.04 (1.03-1.06)         |
| <b>Number of physician-reported comorbidities</b>                                 | 1.32 (1.14-1.53)         | 1.55 (1.29-1.87)         |
| <b>Number of prescribed inhalers</b>                                              | 1.29 (0.97-1.71)         | 1.29 (0.87-1.91)         |
| <b>GINA assessment symptom control</b>                                            |                          |                          |
| Well controlled                                                                   | 0.61 (0.44-0.85)         | 0.51 (0.30-0.85)         |
| Partly controlled/Uncontrolled                                                    | Reference                | Reference                |
| <b>CARAT T</b>                                                                    | 0.93 (0.91-0.96)         | 0.91 (0.88-0.95)         |
| <b>Quality of life (EQ-5D total)</b>                                              | 0.94 (0.92-0.95)         | 0.94 (0.93-0.96)         |
| <b>Perception of better health (EQ-5D VAS)</b>                                    | 0.96 (0.95-0.97)         | 0.96 (0.95-0.97)         |

OR = Odds ratio; CI= Confidence interval; BMI=body mass index; GINA = Global Initiative for Asthma; CARAT-T=Control of Allergic Rhinitis and Asthma Test total score; EQ-5D= European Quality of Life Five Dimension Questionnaire.



STROBE Statement—Checklist of items that should be included in reports of *cohort studies*

|                              | Item No | Recommendation                                                                                                                                                                                                                                                                                                         | Page No                               |
|------------------------------|---------|------------------------------------------------------------------------------------------------------------------------------------------------------------------------------------------------------------------------------------------------------------------------------------------------------------------------|---------------------------------------|
| <b>Title and abstract</b>    | 1       | (a) Indicate the study's design with a commonly used term in the title or the abstract<br>(b) Provide in the abstract an informative and balanced summary of what was done and what was found                                                                                                                          | 3<br>3                                |
| <b>Introduction</b>          |         |                                                                                                                                                                                                                                                                                                                        |                                       |
| Background/rationale         | 2       | Explain the scientific background and rationale for the investigation being reported                                                                                                                                                                                                                                   | 6-7                                   |
| Objectives                   | 3       | State specific objectives, including any prespecified hypotheses                                                                                                                                                                                                                                                       | 7                                     |
| <b>Methods</b>               |         |                                                                                                                                                                                                                                                                                                                        |                                       |
| Study design                 | 4       | Present key elements of study design early in the paper                                                                                                                                                                                                                                                                | 7                                     |
| Setting                      | 5       | Describe the setting, locations, and relevant dates, including periods of recruitment, exposure, follow-up, and data collection                                                                                                                                                                                        | 8                                     |
| Participants                 | 6       | (a) Give the eligibility criteria, and the sources and methods of selection of participants. Describe methods of follow-up<br>(b) For matched studies, give matching criteria and number of exposed and unexposed                                                                                                      | 8<br>NA                               |
| Variables                    | 7       | Clearly define all outcomes, exposures, predictors, potential confounders, and effect modifiers. Give diagnostic criteria, if applicable                                                                                                                                                                               | 8-9                                   |
| Data sources/<br>measurement | 8*      | For each variable of interest, give sources of data and details of methods of assessment (measurement). Describe comparability of assessment methods if there is more than one group                                                                                                                                   | 8-9                                   |
| Bias                         | 9       | Describe any efforts to address potential sources of bias                                                                                                                                                                                                                                                              | NA                                    |
| Study size                   | 10      | Explain how the study size was arrived at                                                                                                                                                                                                                                                                              | NA                                    |
| Quantitative variables       | 11      | Explain how quantitative variables were handled in the analyses. If applicable, describe which groupings were chosen and why                                                                                                                                                                                           | 10                                    |
| Statistical methods          | 12      | (a) Describe all statistical methods, including those used to control for confounding<br>(b) Describe any methods used to examine subgroups and interactions<br>(c) Explain how missing data were addressed<br>(d) If applicable, explain how loss to follow-up was addressed<br>(e) Describe any sensitivity analyses | 10<br>10<br>10<br>NA<br>NA            |
| <b>Results</b>               |         |                                                                                                                                                                                                                                                                                                                        |                                       |
| Participants                 | 13*     | (a) Report numbers of individuals at each stage of study—eg numbers potentially eligible, examined for eligibility, confirmed eligible, included in the study, completing follow-up, and analysed<br>(b) Give reasons for non-participation at each stage<br>(c) Consider use of a flow diagram                        | 11<br>NA<br>NA                        |
| Descriptive data             | 14*     | (a) Give characteristics of study participants (eg demographic, clinical, social) and information on exposures and potential confounders<br>(b) Indicate number of participants with missing data for each variable of interest<br>(c) Summarise follow-up time (eg, average and total amount)                         | 11,<br>table<br>1<br>Table<br>1<br>NA |
| Outcome data                 | 15*     | Report numbers of outcome events or summary measures over time                                                                                                                                                                                                                                                         | NA                                    |

|    |                          |    |                                                                                                                                                                                                              |       |
|----|--------------------------|----|--------------------------------------------------------------------------------------------------------------------------------------------------------------------------------------------------------------|-------|
| 1  | Main results             | 16 | (a) Give unadjusted estimates and, if applicable, confounder-adjusted estimates and their precision (eg, 95% confidence interval). Make clear which confounders were adjusted for and why they were included | 11-12 |
| 2  |                          |    | (b) Report category boundaries when continuous variables were categorized                                                                                                                                    | 11-12 |
| 3  |                          |    | (c) If relevant, consider translating estimates of relative risk into absolute risk for a meaningful time period                                                                                             | NA    |
| 4  | Other analyses           | 17 | Report other analyses done—eg analyses of subgroups and interactions, and sensitivity analyses                                                                                                               | NA    |
| 5  | <b>Discussion</b>        |    |                                                                                                                                                                                                              |       |
| 6  | Key results              | 18 | Summarise key results with reference to study objectives                                                                                                                                                     | 12    |
| 7  | Limitations              | 19 | Discuss limitations of the study, taking into account sources of potential bias or imprecision. Discuss both direction and magnitude of any potential bias                                                   | 15-16 |
| 8  | Interpretation           | 20 | Give a cautious overall interpretation of results considering objectives, limitations, multiplicity of analyses, results from similar studies, and other relevant evidence                                   | 12-15 |
| 9  | Generalisability         | 21 | Discuss the generalisability (external validity) of the study results                                                                                                                                        | 16    |
| 10 | <b>Other information</b> |    |                                                                                                                                                                                                              |       |
| 11 | Funding                  | 22 | Give the source of funding and the role of the funders for the present study and, if applicable, for the original study on which the present article is based                                                | 4     |

\*Give information separately for exposed and unexposed groups.

**Note:** An Explanation and Elaboration article discusses each checklist item and gives methodological background and published examples of transparent reporting. The STROBE checklist is best used in conjunction with this article (freely available on the Web sites of PLoS Medicine at <http://www.plosmedicine.org/>, Annals of Internal Medicine at <http://www.annals.org/>, and Epidemiology at <http://www.epidem.com/>). Information on the STROBE Initiative is available at <http://www.strobe-statement.org>.
