# Supplementary material for: Symptoms of anxiety and depression in patients with persistent asthma: a cross-sectional analysis of the INSPIRERS studies
Source: PubMed Central journal article supplement — BMJ Open. 2023 May 5;13(5):e068725. doi: 10.1136/bmjopen-2022-068725 (PMC10163458; doi:10.1136/bmjopen-2022-068725), 2023-05-05
Supplement: bmjopen-2022-068725supp001.pdf [file bmjopen-2022-068725supp001.pdf]

## 1 Supplementary table 1 – Univariate analyses to explain anxiety and depression symptoms.

|                                                                                   | <b>Anxiety</b>           | <b>Depression</b>        |
|-----------------------------------------------------------------------------------|--------------------------|--------------------------|
|                                                                                   | <b>crude OR (95% CI)</b> | <b>crude OR (95% CI)</b> |
| <b>Age</b>                                                                        | 1.02 (1.01-1.03)         | 1.05 (1.03-1.06)         |
| <b>Age group</b>                                                                  |                          |                          |
| Adolescent                                                                        | 0.39 (0.26-0.59)         | 0.39 (0.19-0.78)         |
| Adult                                                                             | Reference                | Reference                |
| <b>Gender</b>                                                                     |                          |                          |
| Females                                                                           | 2.44 (1.68-3.53)         | 1.64 (0.95-2.85)         |
| Males                                                                             | Reference                | Reference                |
| <b>Educational level</b>                                                          |                          |                          |
| No education completed/Primary school                                             | 0.99 (0.71-1.39)         | 1.67 (1.01-2.74)         |
| High school/Qualification above high school (but not university)/University/Other | Reference                | Reference                |
| <b>Marital status</b>                                                             |                          |                          |
| Single/ Separated/Divorced/Widowed                                                | 0.72 (0.52-1.02)         | 0.45 (0.27-0.74)         |
| Married/Living as a couple                                                        | Reference                | Reference                |
| <b>Current occupation</b>                                                         |                          |                          |
| Employed/Student/Other                                                            | 0.55 (0.35-0.87)         | 0.25 (0.14-0.43)         |
| Unemployed/Retired                                                                | Reference                | Reference                |
| <b>BMI</b>                                                                        | 1.03 (0.99-1.06)         | 1.08 (1.04-1.13)         |
| <b>Smoking status</b>                                                             |                          |                          |
| Non-smokers                                                                       | 0.56 (0.31-1.02)         | 0.92 (0.37-2.24)         |
| Smokers                                                                           | Reference                | Reference                |
| <b>Setting</b>                                                                    |                          |                          |
| Primary care                                                                      | 1.60 (1.09-2.35)         | 1.04 (0.58-1.86)         |
| Secondary care                                                                    | Reference                | Reference                |
| <b>Age of asthma diagnosis</b>                                                    | 1.02 (1.01-1.03)         | 1.04 (1.03-1.06)         |
| <b>Number of physician-reported comorbidities</b>                                 | 1.32 (1.14-1.53)         | 1.55 (1.29-1.87)         |
| <b>Number of prescribed inhalers</b>                                              | 1.29 (0.97-1.71)         | 1.29 (0.87-1.91)         |
| <b>GINA assessment symptom control</b>                                            |                          |                          |
| Well controlled                                                                   | 0.61 (0.44-0.85)         | 0.51 (0.30-0.85)         |
| Partly controlled/Uncontrolled                                                    | Reference                | Reference                |
| <b>CARAT T</b>                                                                    | 0.93 (0.91-0.96)         | 0.91 (0.88-0.95)         |
| <b>Quality of life (EQ-5D total)</b>                                              | 0.94 (0.92-0.95)         | 0.94 (0.93-0.96)         |
| <b>Perception of better health (EQ-5D VAS)</b>                                    | 0.96 (0.95-0.97)         | 0.96 (0.95-0.97)         |

2 OR = Odds ratio; CI= Confidence interval; BMI=body mass index; GINA = Global Initiative for Asthma; CARAT-T=Control of Allergic Rhinitis  
3 and Asthma Test total score; EQ-5D= European Quality of Life Five Dimension Questionnaire.
